# Supplementary material for: IAA Dan Super Bionik Mempengaruhi Pertumbuhan Dan Produksi Mentimun (Cucumis sativus L.)
Source: Springer Nature journal article supplement (doi:10.1007/s00401-020-02134-w), 2012-05-02
Supplement: MOESM1 [file 17666206]

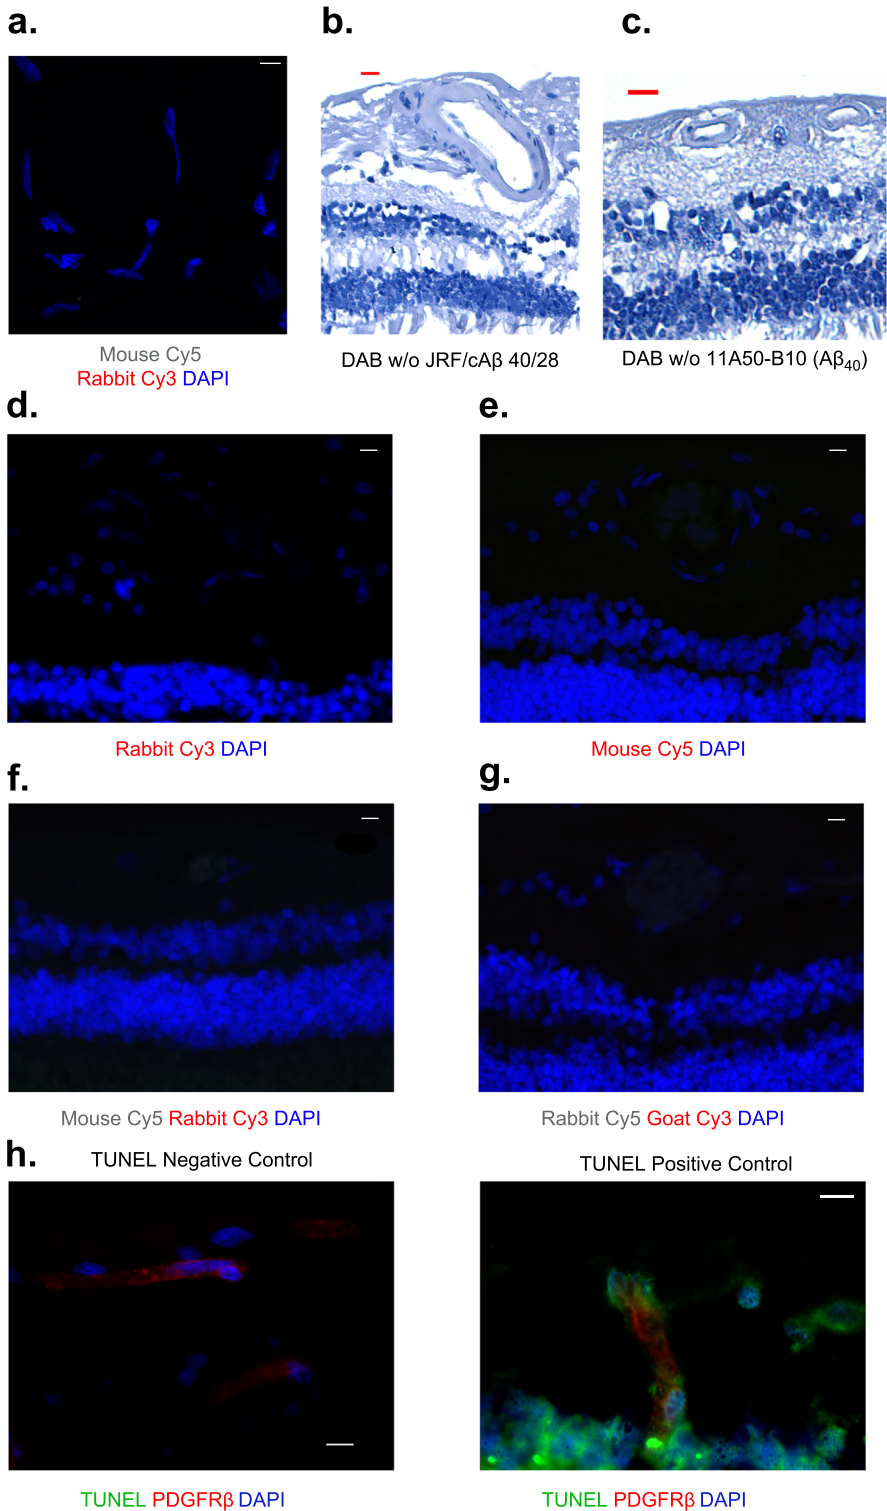

**Supplementary Figure 1.** Negative controls for all immunofluorescent staining. **a.** Representative images of negative controls (primary antibodies omitted) for isolated vascular staining in figure 1, with secondary antibodies (donkey anti-rabbit Cy3 and anti-mouse Cy5) and DAPI. Scale bar=10 $\mu$ m. **b-c.** Representative images of negative controls (primary antibodies omitted) for DAB staining without (w/o) **b.** JRF/cA $\beta$  40/28 or **c.** 11A50-B10 (A $\beta$ <sub>40</sub>). Scale bars=20 $\mu$ m. **d.** Representative image of negative controls (primary antibodies omitted) for retinal cross-section staining in figure 2, with secondary antibody (donkey anti-rabbit Cy3) and DAPI. Scale bar=10 $\mu$ m. **e.** Representative image of negative controls (primary antibodies omitted) for retinal cross-section staining in figure 3 and 4, with secondary antibody (donkey anti-mouse Cy5) and DAPI. Scale bar=10 $\mu$ m. **f.** Representative image of negative controls (primary antibodies omitted) for retinal cross-section staining in figures 3 and 4, with secondary antibodies (donkey anti-rabbit Cy3 and anti-mouse Cy5) and DAPI. Scale bar=10 $\mu$ m. **g.** Representative image of negative controls (primary antibodies omitted) for retinal cross-section staining in figure 6, with secondary antibodies (donkey anti-goat Cy3 and anti-rabbit Cy5) and DAPI. Scale bar=10 $\mu$ m. **h.** Representative images of negative control (without terminal transferase) and positive control (pretreatment with DNaseI) for TUNEL staining experiment in figure 6. Scale bars=10 $\mu$ m.

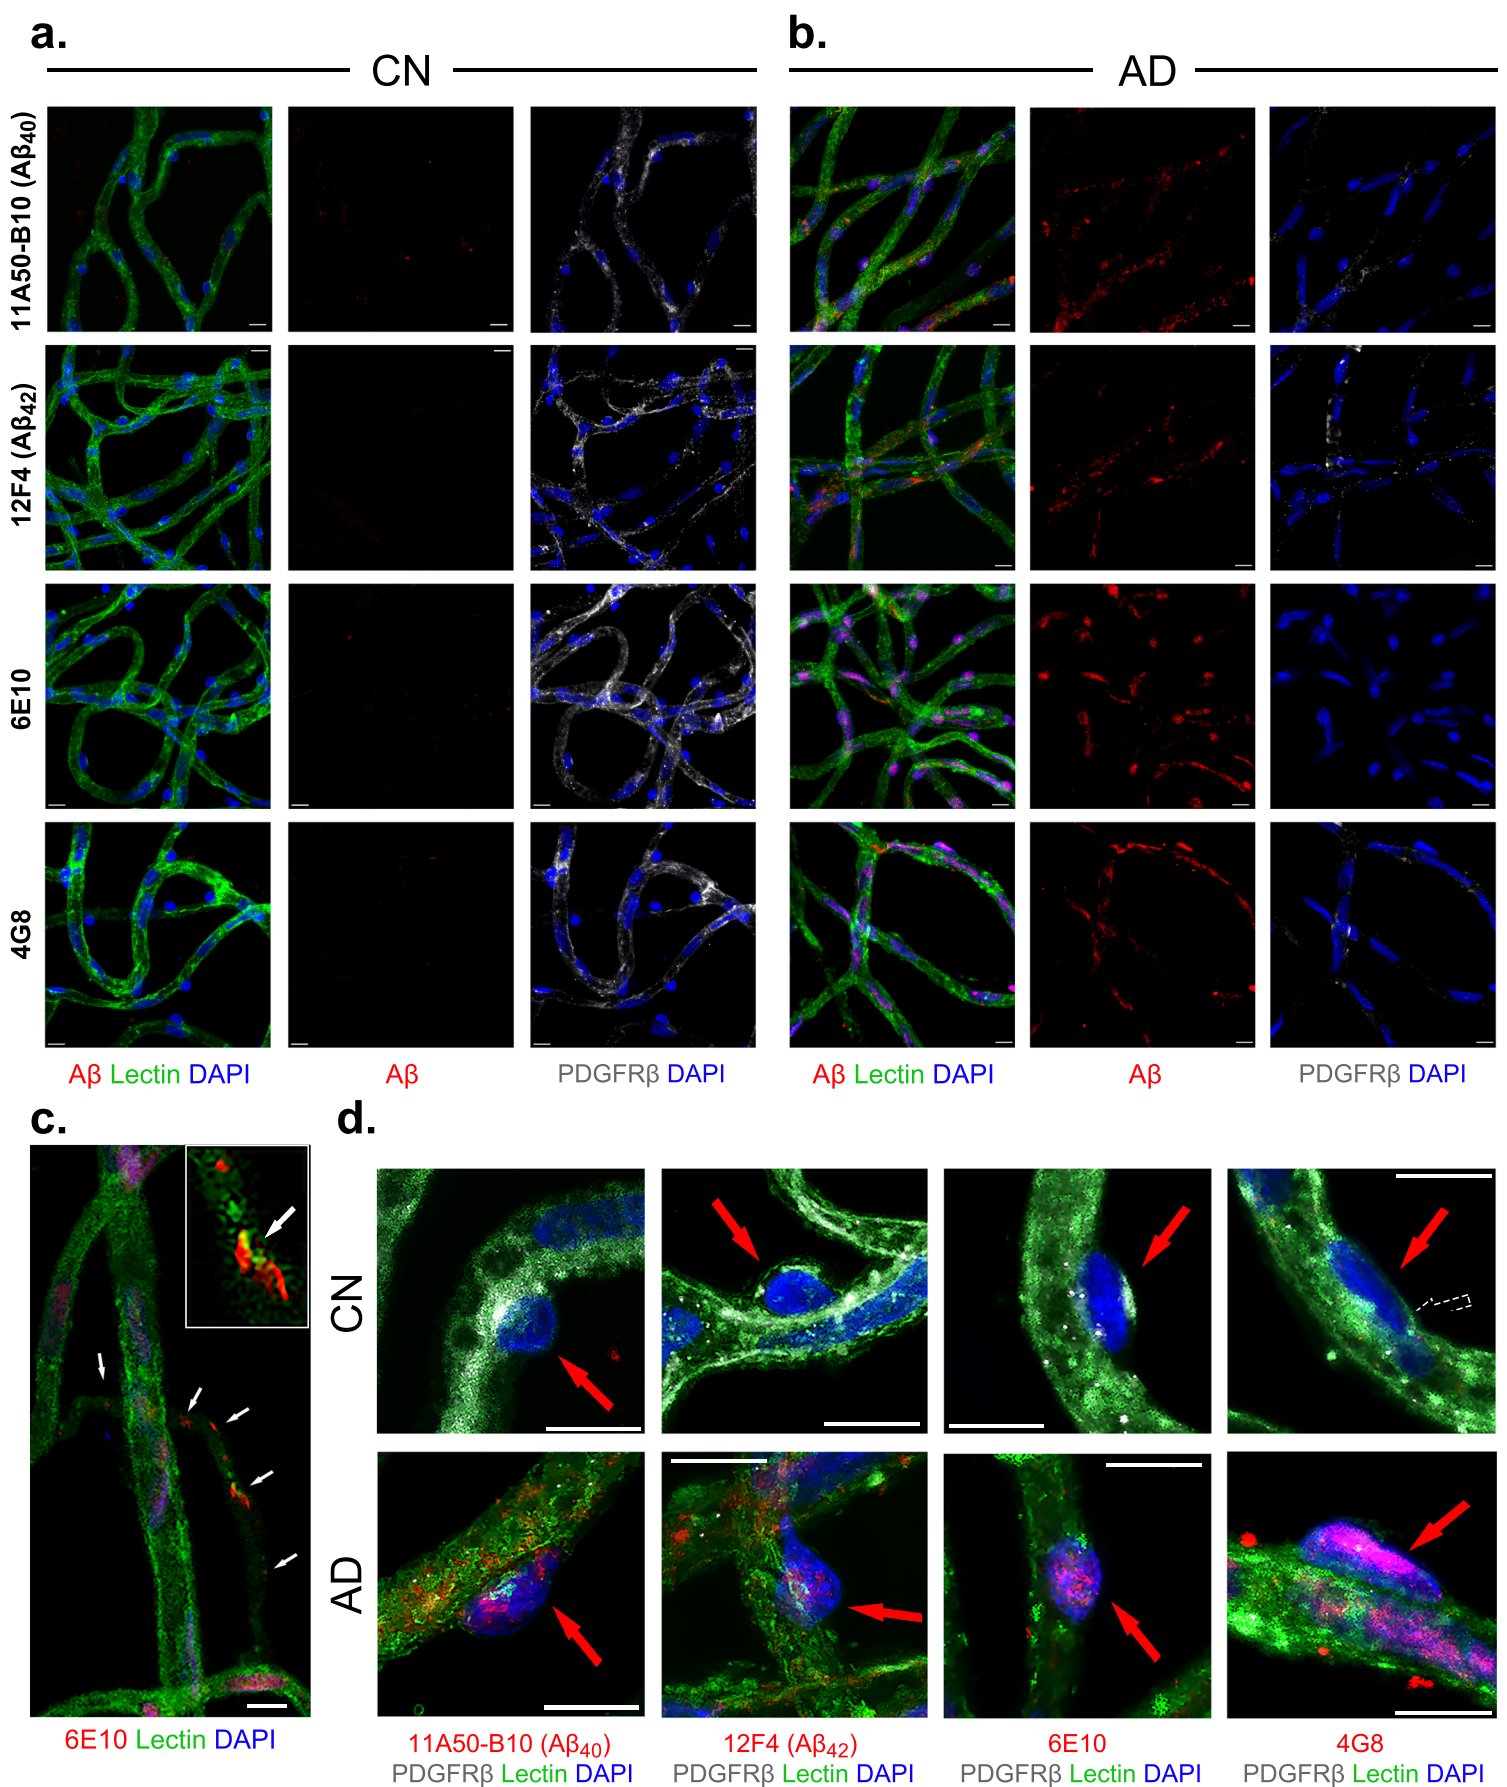

**Supplementary Figure 2.** Extended representative images for figure 1 on retinal microvascular  $A\beta$  and PDGFR  $\beta^+$  pericytes. **a-b.** Separate channels of representative fluorescent images for  $A\beta$  (11A50-B10, 12F4, 6E10 or 4G8 as indicated, red), PDGFR $\beta$  (pericytes, white), lectin (glycoprotein in blood vessel, green) and DAPI (nuclei, blue) on isolated retinal microvasculature from age and sex-matched human donors with AD (n=5) or cognitively normal (CN, n=5). **c.**  $A\beta$  (6E10, red), lectin (green) and DAPI (blue) staining showing  $A\beta$  deposits in a degenerated, acellular capillary (indicated by arrows). Upper right image shows zoomed-in image from the original. **d.** Enlarged confocal images of retinal microvascular pericytes from AD and CN donors ( $A\beta$ -red, PDGFR $\beta$ -white, lectin-green, DAPI-blue). Scale bars=10 $\mu$ m.

**a.** ADTg Non-perfused  
Mouse [M, 8.5mo]

4G8 Lectin DAPI

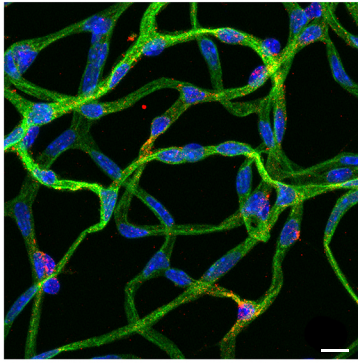

**b.** ADTg Perfused  
Mouse [M, 8.5mo]

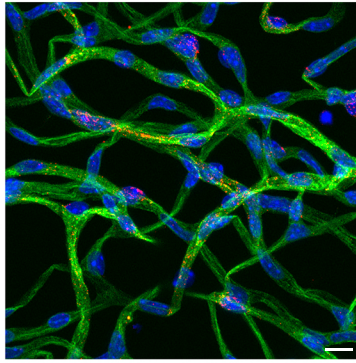

**c.** WT Perfused  
Mouse [M, 8.5mo]

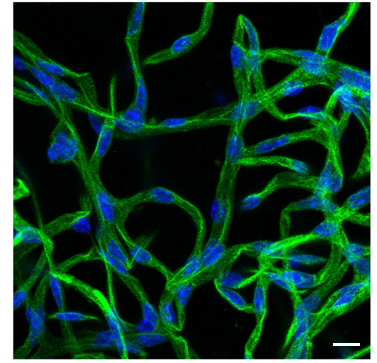

4G8

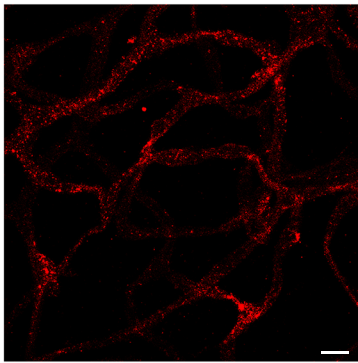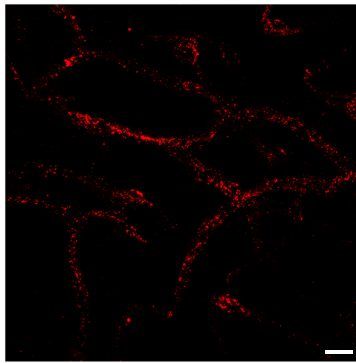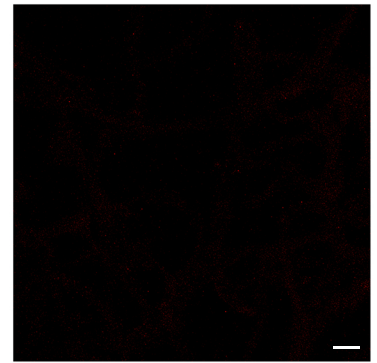

Lectin DAPI

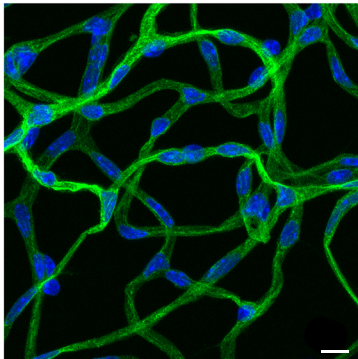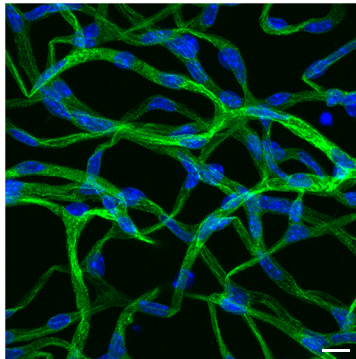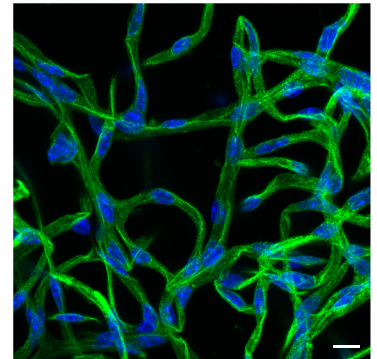

**Supplementary Figure 3.** Significant retinal vascular A $\beta$  deposition in perfused transgenic ADTg mice. **a-c.** Representative fluorescent images for A $\beta$  (4G8, red), lectin (glycoprotein in blood vessel, green) and DAPI (nuclei, blue) on isolated retinal microvasculature from **a.** non-perfused 8.5 month old male ADTg mice, or **b.** perfused 8.5 month old male ADTg mice, and **c.** perfused 8.5 month old male wild type mice. Scale bars=10 $\mu$ m.

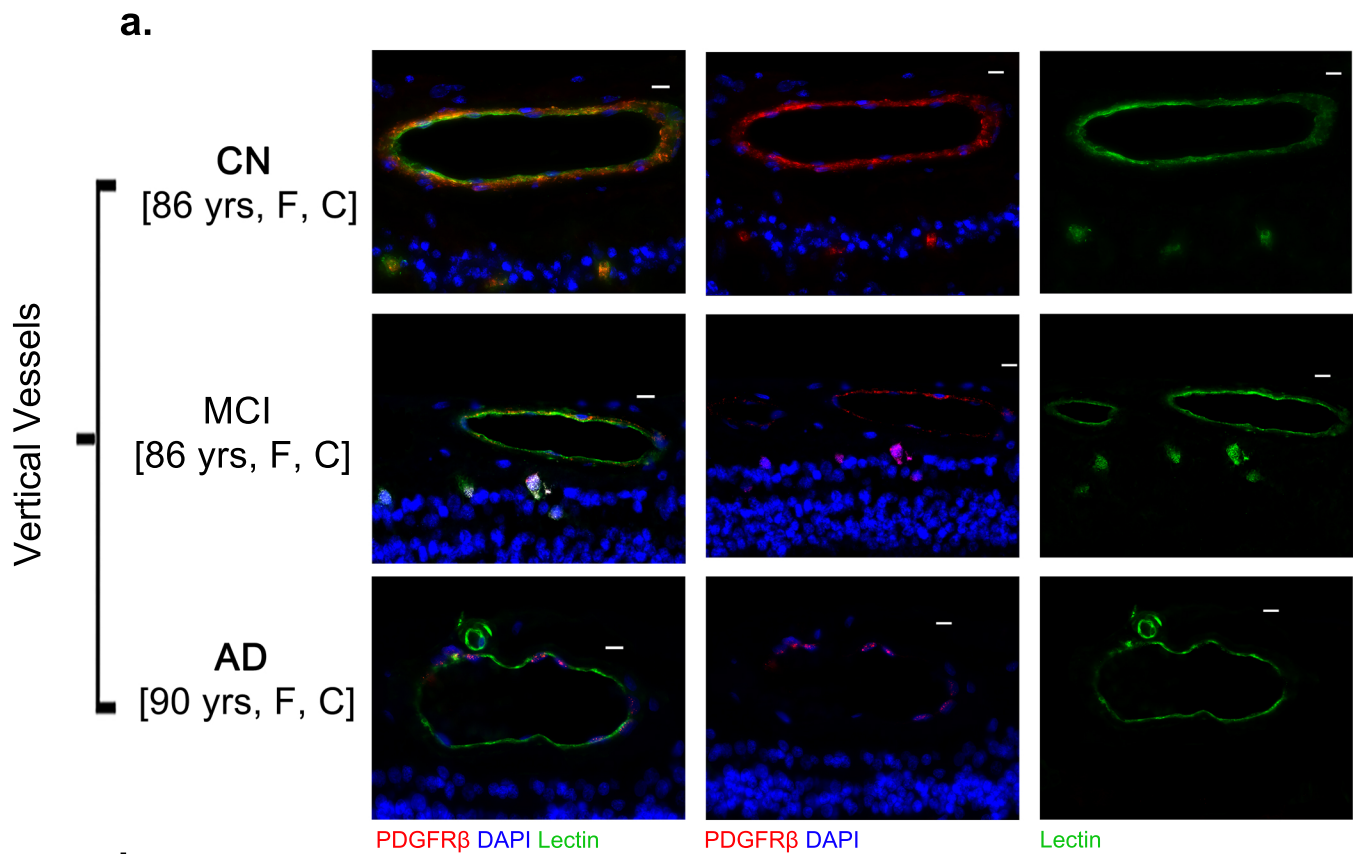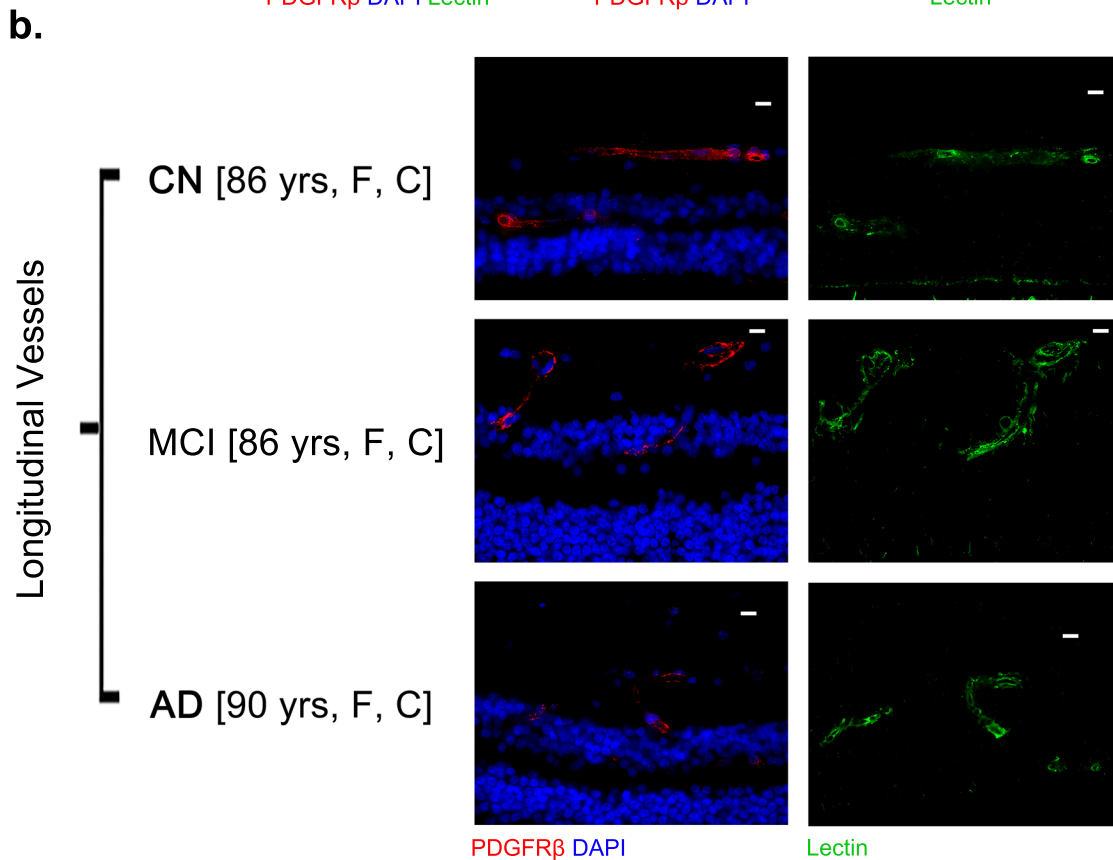

**Supplementary Figure 4.** Extended representative images for figure 2 on retinal vascular PDGFR $\beta$ . **a-b.** Merged and separate channels of representative fluorescent images for PDGFR $\beta$  (red), lectin (glycoprotein in blood vessel, green) and DAPI (nuclei, blue) in paraffin-embedded retinal cross-sections isolated from age and sex-matched human donors with AD, MCI or cognitively normal (CN). **a.** Vertical (V) and **b.** Longitudinal (L) blood vessels are shown. Scale bars=10 $\mu$ m.

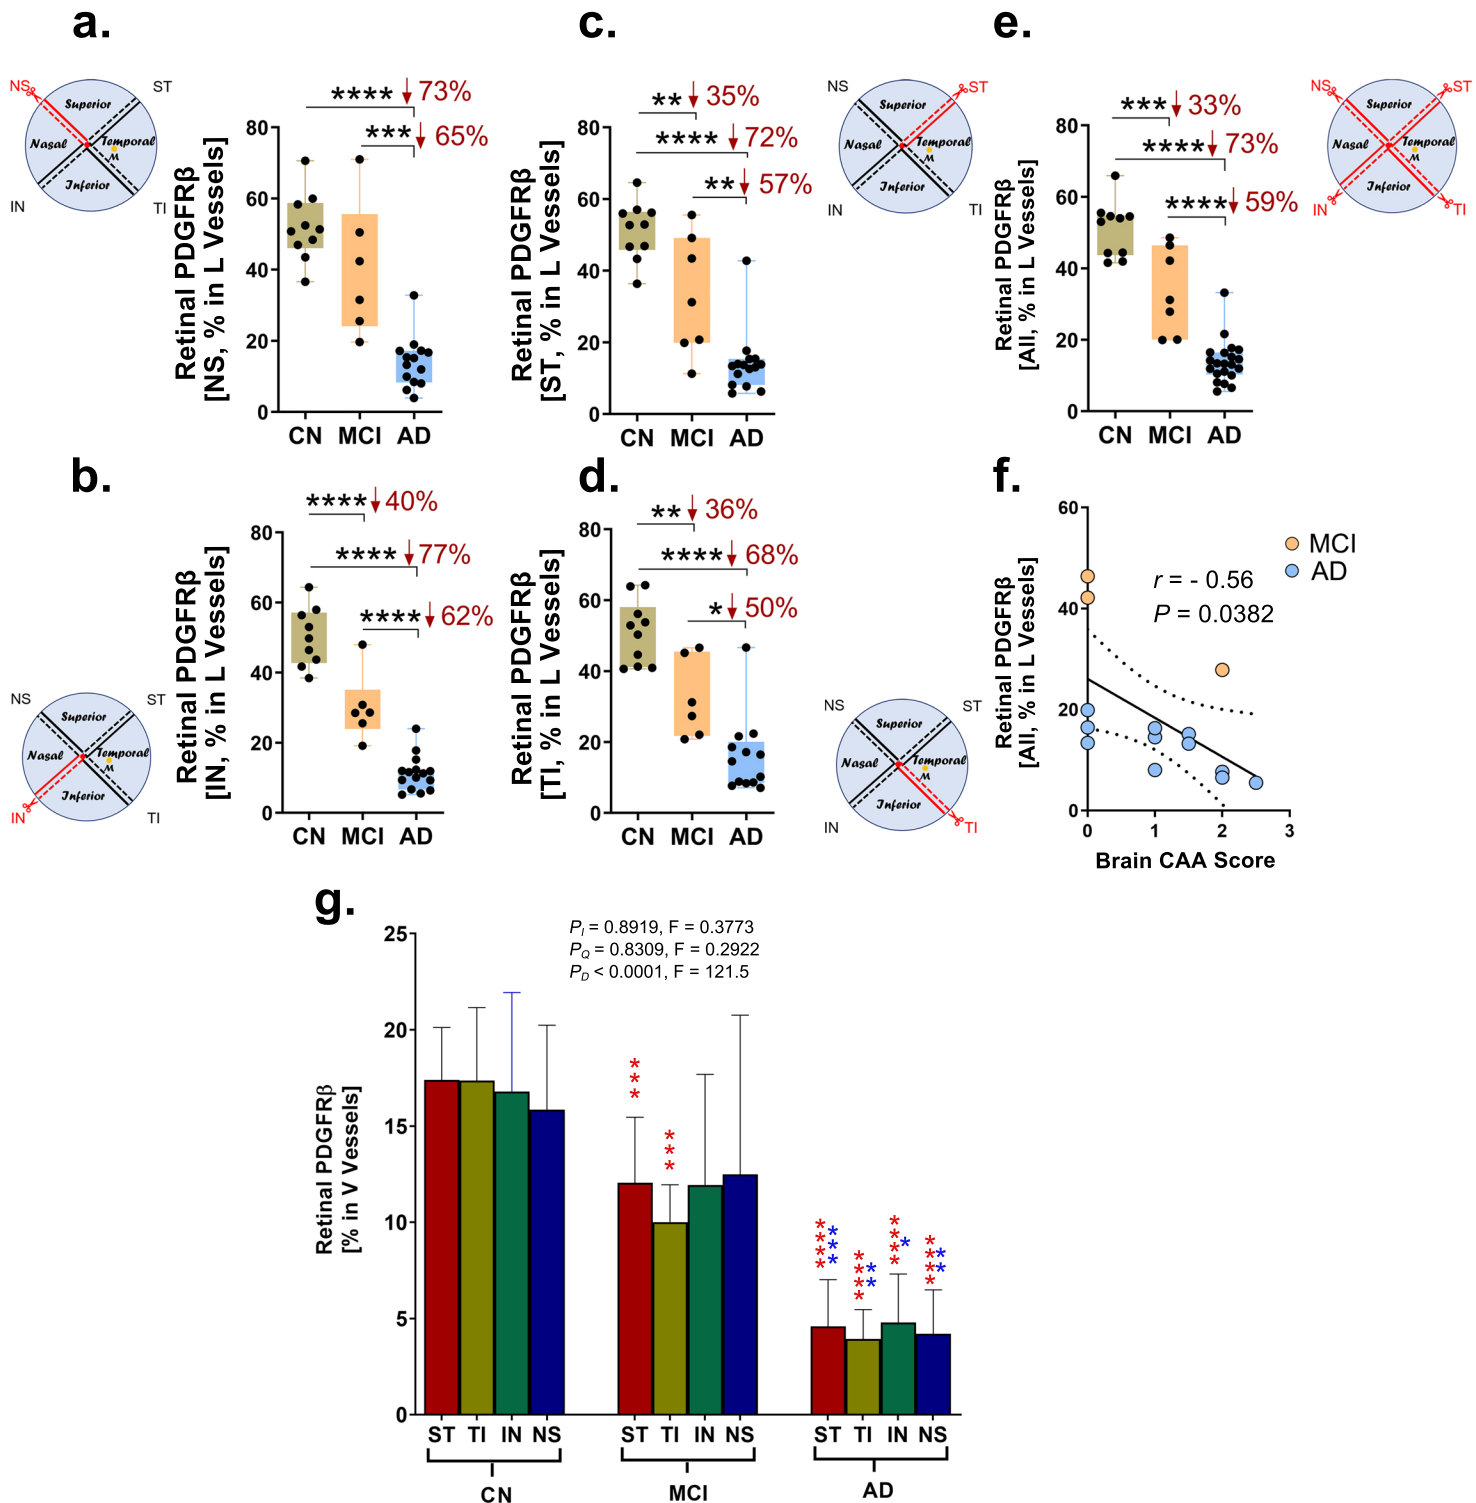

**Supplementary Figure 5.** Extended data on retinal PDGFR $\beta$  in longitudinal vasculature from all retinal quadrant regions in AD, MCI and CN human donors and mapping of PDGFR $\beta$ . **a-d.** Quantitative analysis of % PDGFR $\beta$ -immunoreactive area in longitudinal (L) vessels from each retinal quadrant separately: **a.** NS, **b.** IN, **c.** ST, **d.** TI in total cohort of AD ( $n=21$ ), MCI ( $n=7$ ) and cognitively normal (CN) ( $n=10$ ) human donors. **e-f.** Quantitative analysis of retinal % PDGFR $\beta$  immunoreactivity in L vasculature (average of all four quadrants): **e.** subjects stratified by clinical diagnosis ( $n=38$ ) and **f.** Pearson's correlations against brain CAA scores in a subset of this cohort ( $n=14$ ). **g.** Mapping of vertical (V) vascular PDGFR $\beta$  in four retinal quadrants. (\* indicates AD vs. CN, \* indicates AD vs. MCI) Data from individuals as well as group means and SEMs are shown. \* $p < 0.05$ , \*\* $p < 0.01$ , \*\*\* $p < 0.001$ , \*\*\*\* $p < 0.0001$ , by one-way ANOVA test with Sidak's post-hoc multiple comparison test. Percent change are shown in red.

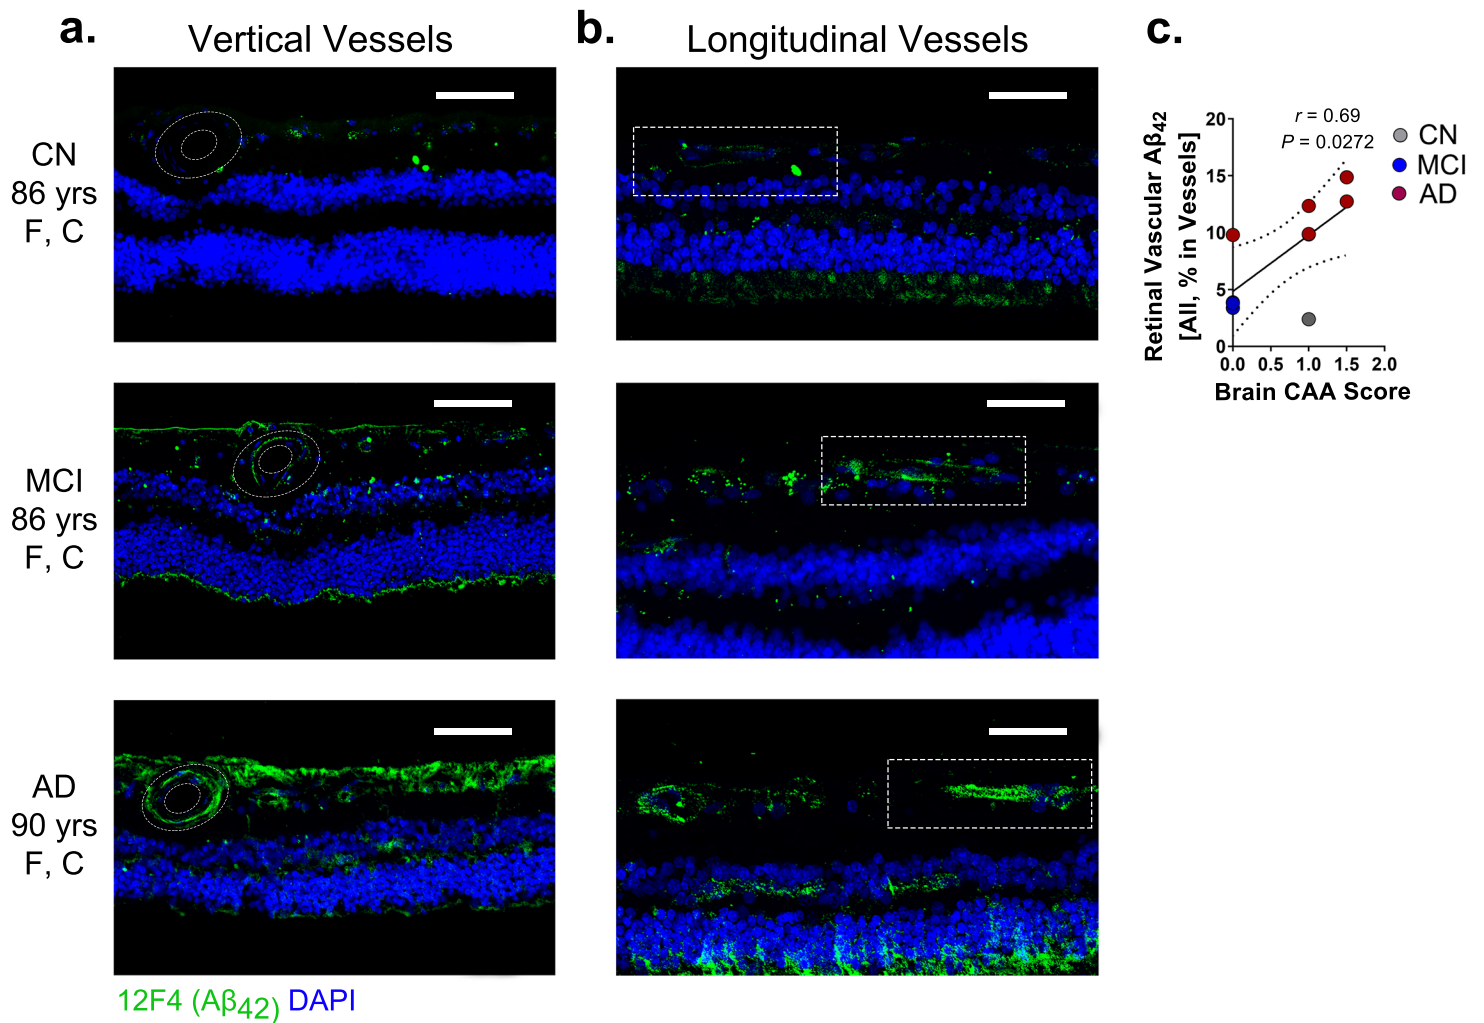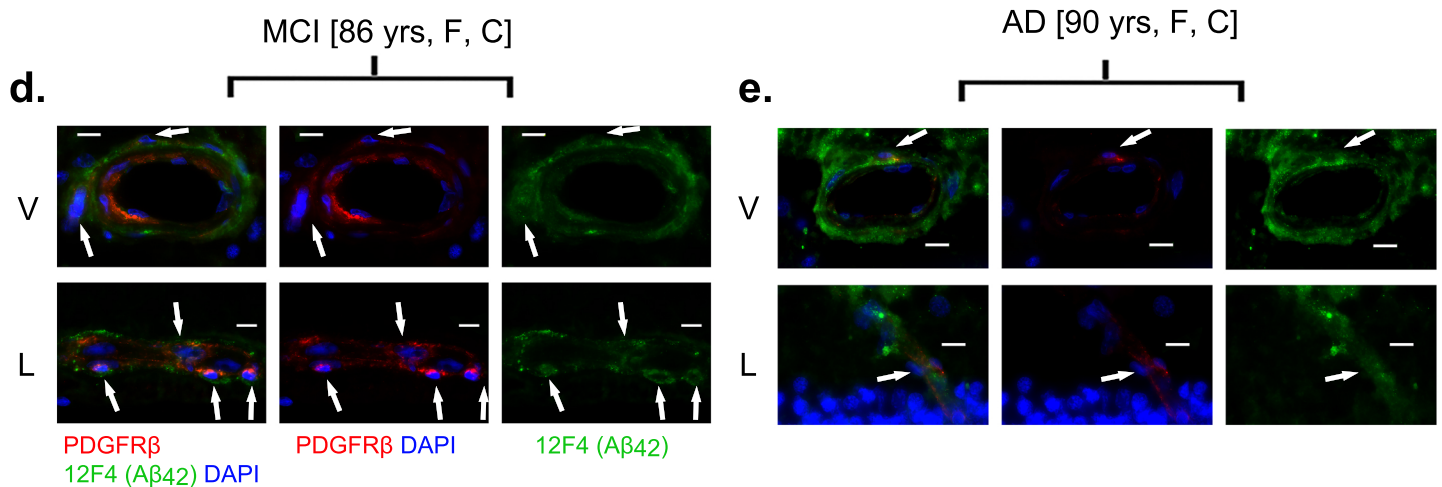

**Supplementary Figure 6.** Extended representative images for figure 3. **a-b.** Representative fluorescent images of paraffin-embedded retinal cross-sections isolated from age and sex-matched human donors with AD, MCI, or cognitively normal (CN) stained for A $\beta_{42}$  (12F4, green) and DAPI (nuclei, blue). **a.** Vertical (V) and **b.** longitudinal (L) blood vessels are shown. Dashed geometric shapes (white) indicate pre-defined areas of analysis. Scale bars=50  $\mu$ m. **c.** Pearson's coefficient ( $r$ ) correlation between retinal 12F4<sup>+</sup> A $\beta_{42}$  burden in both V and L (All) blood vessels against brain CAA score. **d-e.** Merged and separate channels of representative fluorescent images for 12F4 (A $\beta_{42}$ , green), PDGFR $\beta$  (red) and DAPI (nuclei, blue) in paraffin embedded retinal cross-sections isolated from age and sex-matched human subjects with AD and MCI. Arrows point at A $\beta_{42}$  in PDGFR $\beta$ <sup>+</sup> cells. Both retinal V and L blood vessels in **d.** MCI and **e.** AD patients are shown (yrs=years old; F=female; C=Caucasian). Scale bars=10 $\mu$ m.

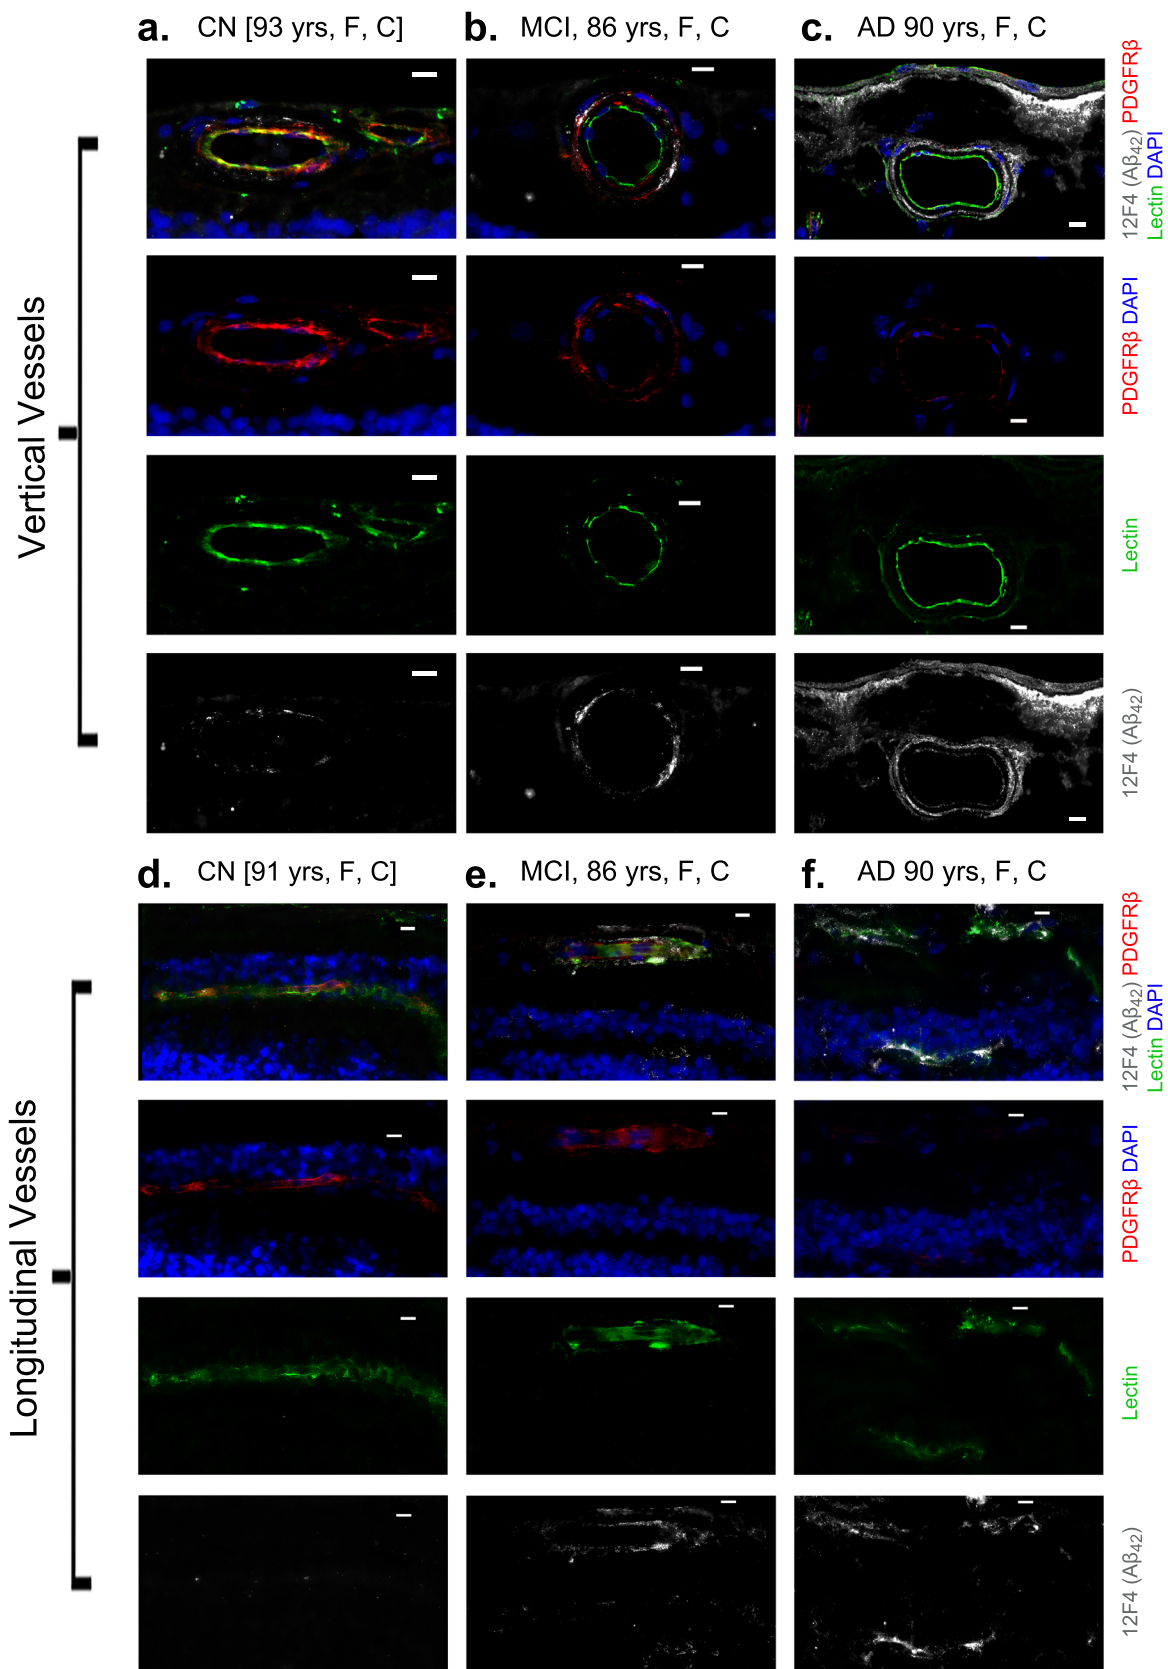

**Supplementary Figure 7.** Expanded representative images for A $\beta$ <sub>42</sub>, PDGFR $\beta$ , lectin and DAPI. **a-f.** Merged and separate channels of representative fluorescent images for 12F4 (A $\beta$ <sub>42</sub>, white), PDGFR $\beta$  (red), lectin (glycoprotein in blood vessel, green) and DAPI (nuclei, blue) in paraffin-embedded retinal cross-sections isolated from age and sex-matched human donors with AD, MCI or cognitively normal (CN). **a-c.** Vertical and **d-f.** Longitudinal vessels are shown (yrs=years old; F=female; C=Caucasian). Scale bars=10 $\mu$ m.

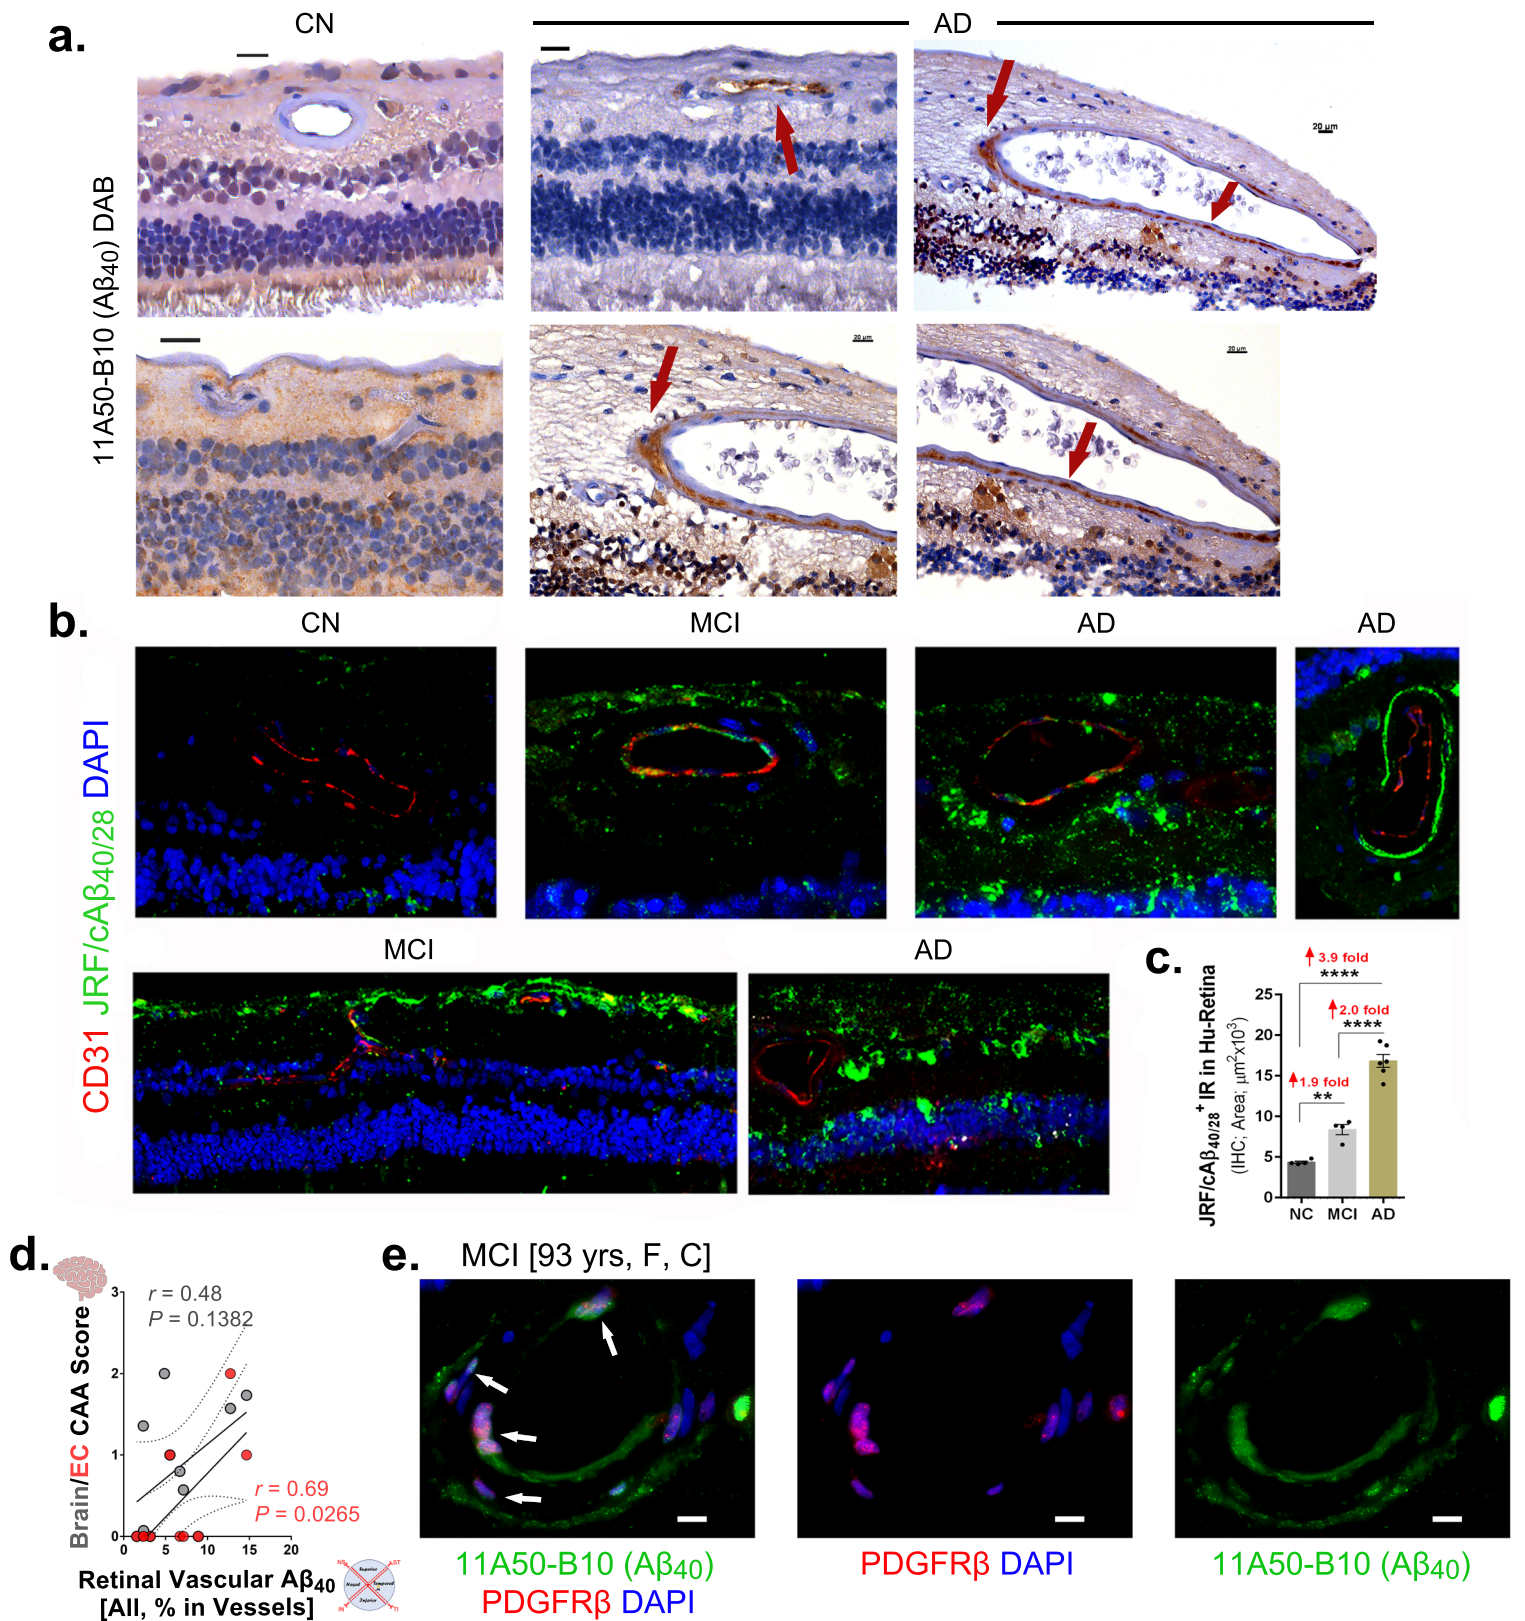

**Supplementary Figure 8.** Extended data on retinal vascular Aβ<sub>40</sub> deposits from MCI and AD human donors compared to cognitively normal controls. **a.** Representative horseradish peroxidase and 3,3'-Diaminobenzidine (DAB) staining of images for 11A50-B10-Aβ<sub>40</sub> in retinas from AD and cognitively normal (CN) subjects. Arrows indicate vascular Aβ<sub>40</sub> staining in tunica intima and media. Scale bars = 20 μm. **b.** Representative fluorescent microscope images of paraffin-embedded retinal cross-sections from AD, MCI and CN stained against Aβ<sub>40</sub> (JRF/cAβ 40/28 antibody; green), endothelial cells (CD31; red) and nuclei (DAPI, blue). **c.** Quantitative analysis of retinal vascular Aβ<sub>40</sub>-IR area in a subset of MCI (n=4), AD (n=6) and CN (n=4) human donors. Data from individual human donors as well as group means and SEMs are shown. \*\**p* < 0.01, \*\*\*\**p* < 0.0001, by one-way ANOVA test with Sidak's post-hoc multiple comparison test. Fold change are shown in red. **d.** Pearson's coefficient (*r*) correlation between retinal Aβ<sub>40</sub> burden (11A50-B10-IR area) in both vertical and longitudinal vasculature (average) against CAA score in parenchymal brain average (grey) and entorhinal cortex (EC, red), within a subset of subjects with AD, MCI and CN (n=10). **e.** High-magnification images showing co-localization of vascular Aβ<sub>40</sub> (green) and PDGFRβ (red; co-localization indicated by arrows) in a MCI subject (yrs=years old; F=female; C=Caucasian). Scale bars = 10 μm.



**a.**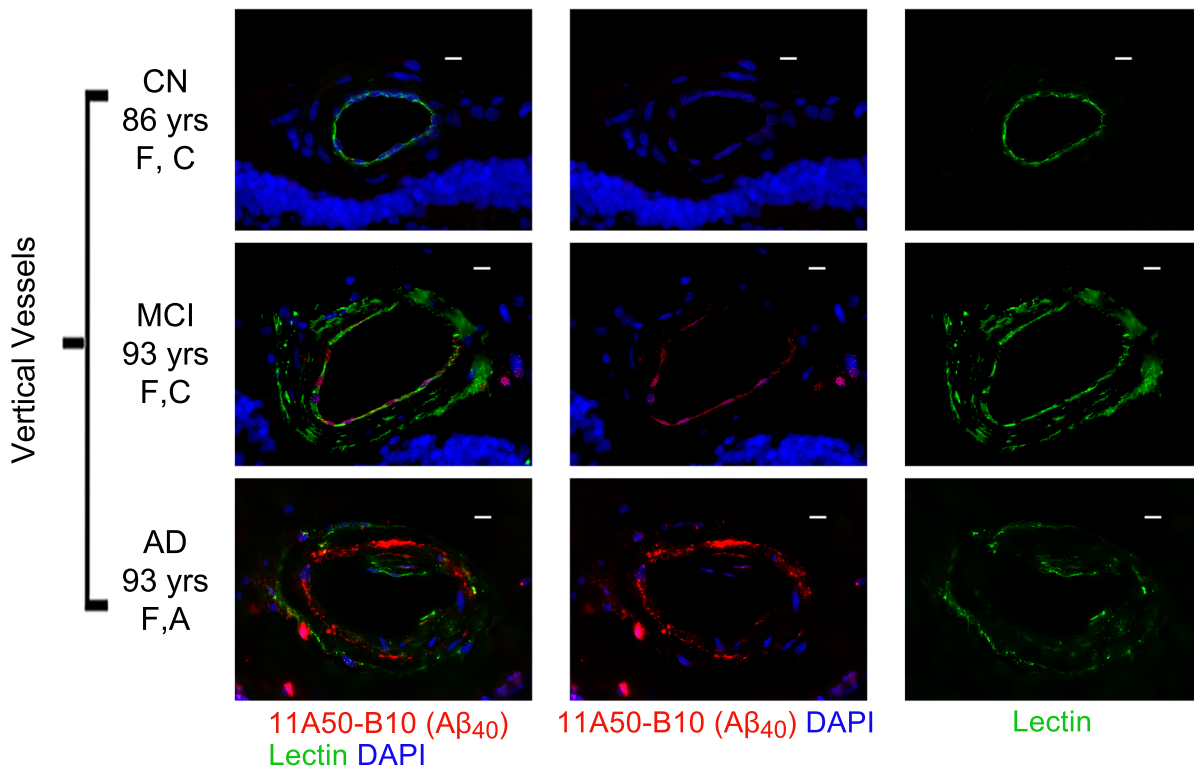**b.**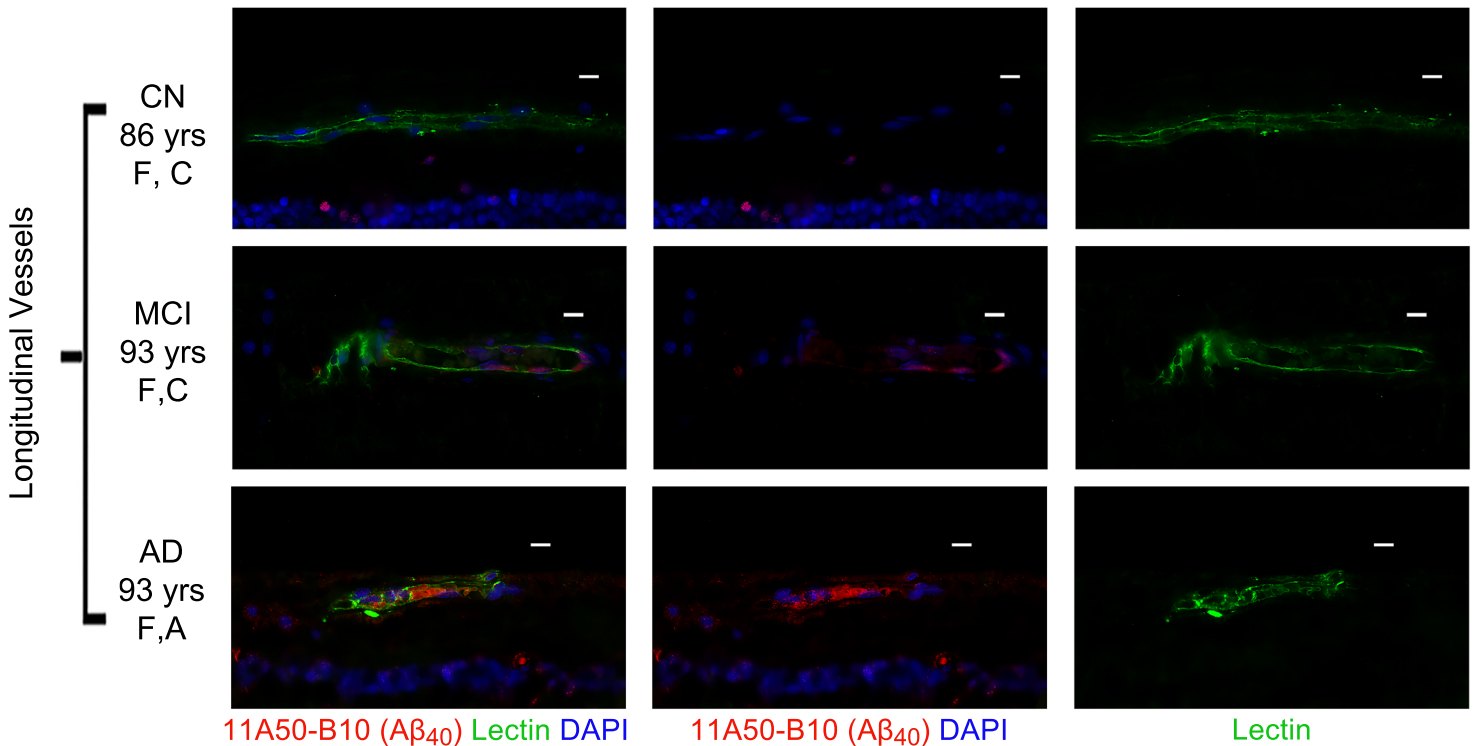

**Supplementary Figure 9.** Extended representative images for retinal  $A\beta_{40}$ . **a-b.** Merged and separate channels of representative fluorescent images for 11A50-B10 ( $A\beta_{40}$ , red), lectin (glycoprotein in blood vessel, green) and DAPI (nuclei, blue) in paraffin-embedded retinal cross-sections isolated from age and sex-matched human donors with AD, MCI or cognitively normal (CN). **a.** Vertical and **b.** Longitudinal vessels are shown (yrs=years old; F=female; C=Caucasian; A=Asian). Scale bars=10 $\mu$ m.

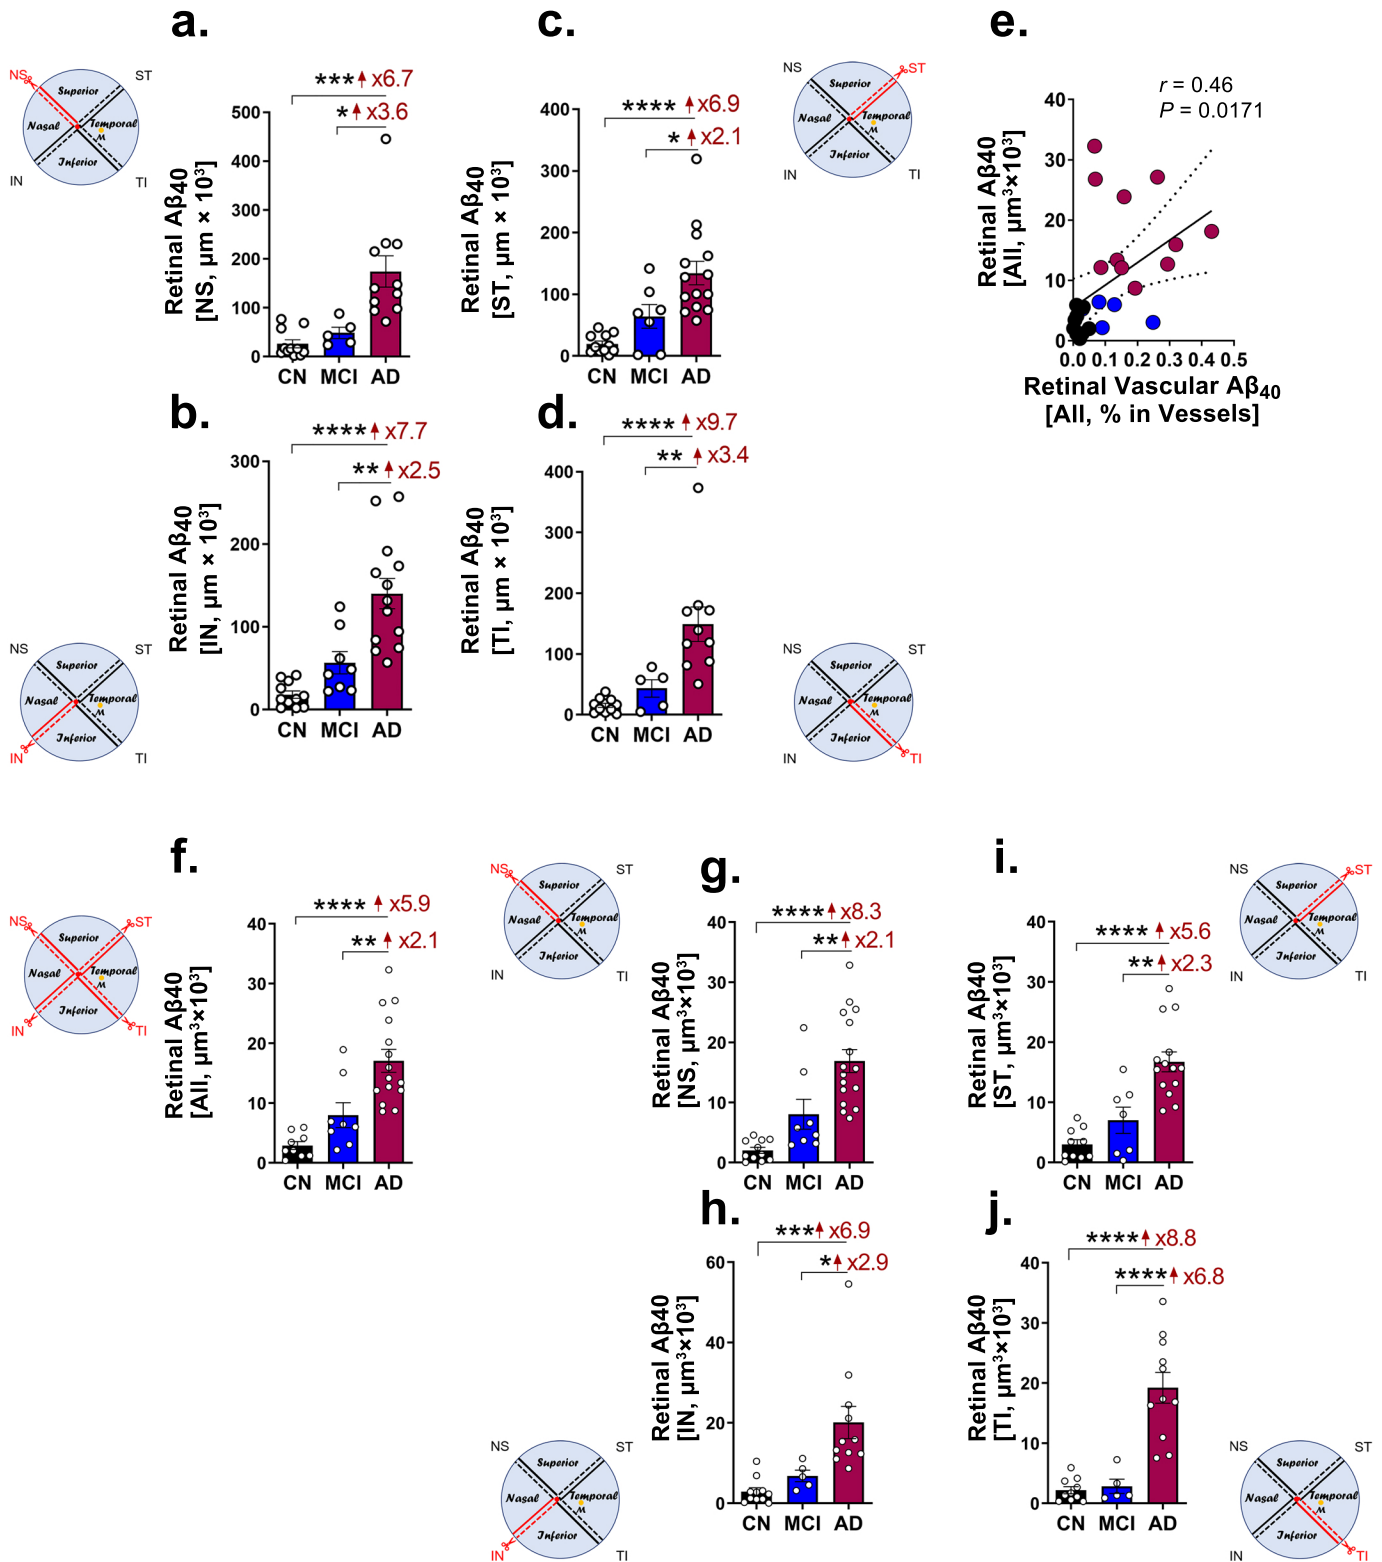

**Supplementary Figure 10.** Supplementary information for quantification of A $\beta_{40}$  in human retina. **a-d.** Quantitative analysis of 11A50-B10 (A $\beta_{40}$ ) immunoreactive (IR) area (normalized by retinal thickness) in retinal layers (from inner to outer limiting membrane) from each retinal quadrant separately: **a.** NS, **b.** IN, **c.** ST, **d.** TI in AD (n=17), MCI (n=8), and CN (n=11) human donors. **e.** Pearson's coefficient (r) correlation between A $\beta_{40}$  IR area and retinal A $\beta_{40}$  burden in blood vessels (n=26). **f-j.** Quantitative analysis of raw data of 11A50-B10 (A $\beta_{40}$ )-IR area in retinal layers from each retinal quadrant separately and all quadrants together: **f.** all retinal quadrants, **g.** NS, **h.** IN, **i.** ST and **j.** TI in AD (n=17), MCI (n=8) and CN (n=11) human donors. \* $p < 0.05$ , \*\* $p < 0.01$ , \*\*\* $p < 0.001$ , \*\*\*\* $p < 0.0001$ , by one-way ANOVA test with Sidak's post-hoc multiple comparison test. Fold changes are shown in red.

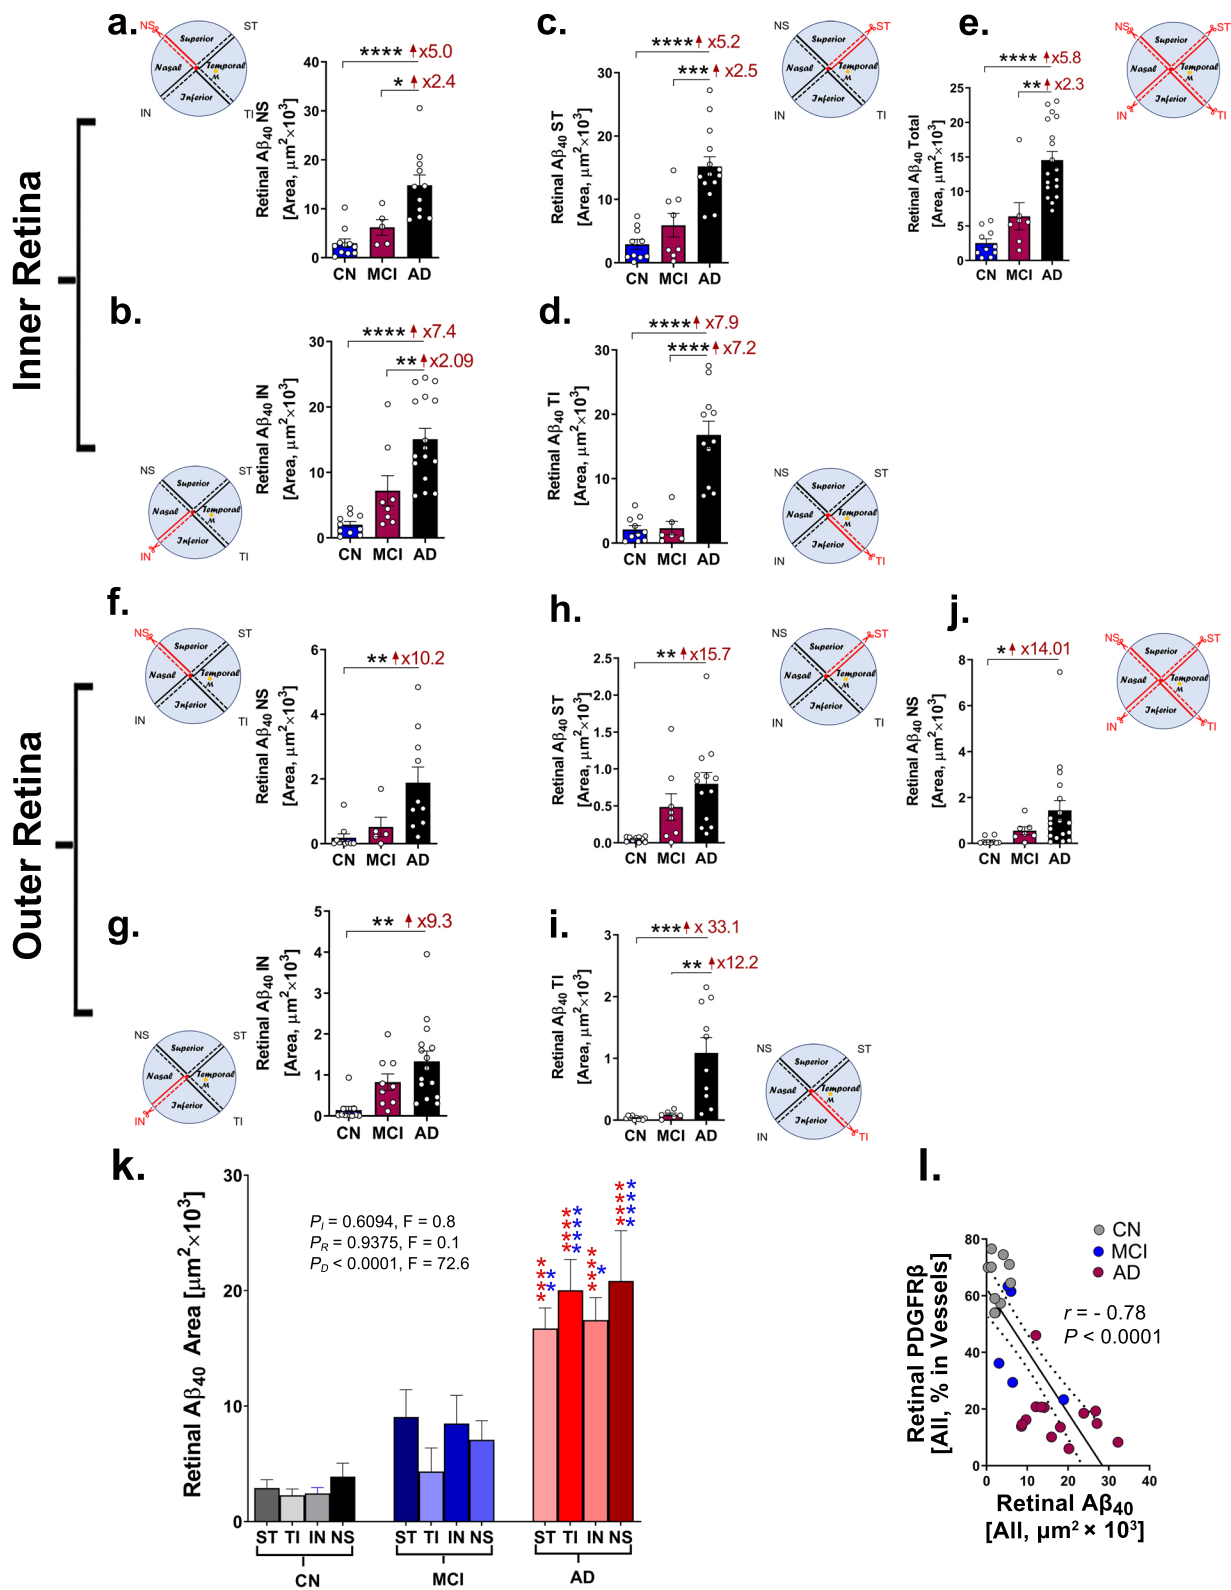

**Supplementary Figure 11.** Extended data of inner vs. outer retinal A $\beta_{40}$  and mapping for all four retinal quadrants. **a-e.** Quantitative analysis of raw data of A $\beta_{40}$ -immunoreactive (IR) area in inner retinal layers from each retinal quadrant separately and all quadrants together: **a.** NS, **b.** IN, **c.** ST, **d.** TI, **e.** all, in AD ( $n=17$ ), MCI ( $n=8$ ) and CN ( $n=11$ ) human donors. **f-j.** Quantitative analysis of raw data of A $\beta_{40}$ -IR area in outer retinal layers from each retinal quadrant separately and all quadrants together: **f.** NS, **g.** IN, **h.** ST, **i.** TI, **j.** all, in AD ( $n=17$ ), MCI ( $n=8$ ) and CN ( $n=11$ ) human donors. **k.** Mapping of A $\beta_{40}$  in four retinal quadrants (\* indicates AD vs. CN, \* indicates AD vs. MCI). **l.** Pearson's coefficient (r) correlation between A $\beta_{40}$  IR area against % PDGFR $\beta$ -IR area in vessels ( $n=28$ ). Data from individual human donor as well as group means and SEMs are shown. \* $p < 0.05$ , \*\* $p < 0.01$ , \*\*\* $p < 0.001$ , \*\*\*\* $p < 0.0001$ , by one-way or two-way ANOVA test with Sidak's post-hoc multiple comparison test. Fold changes are shown in red.

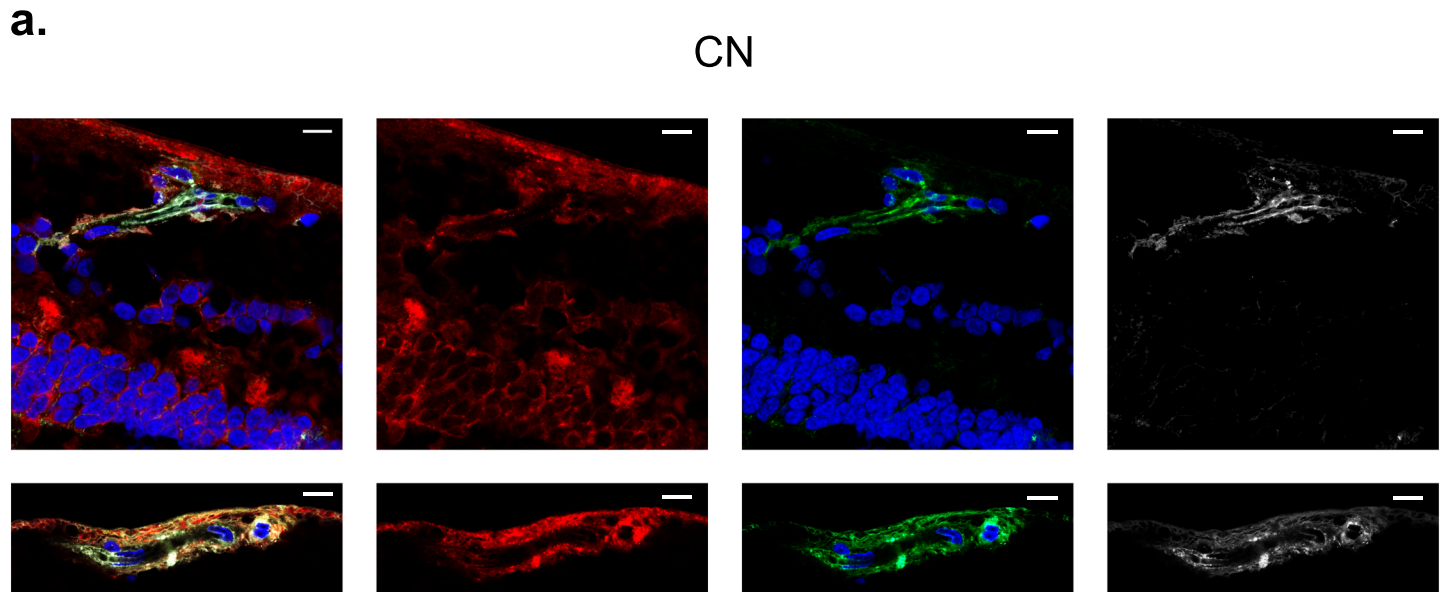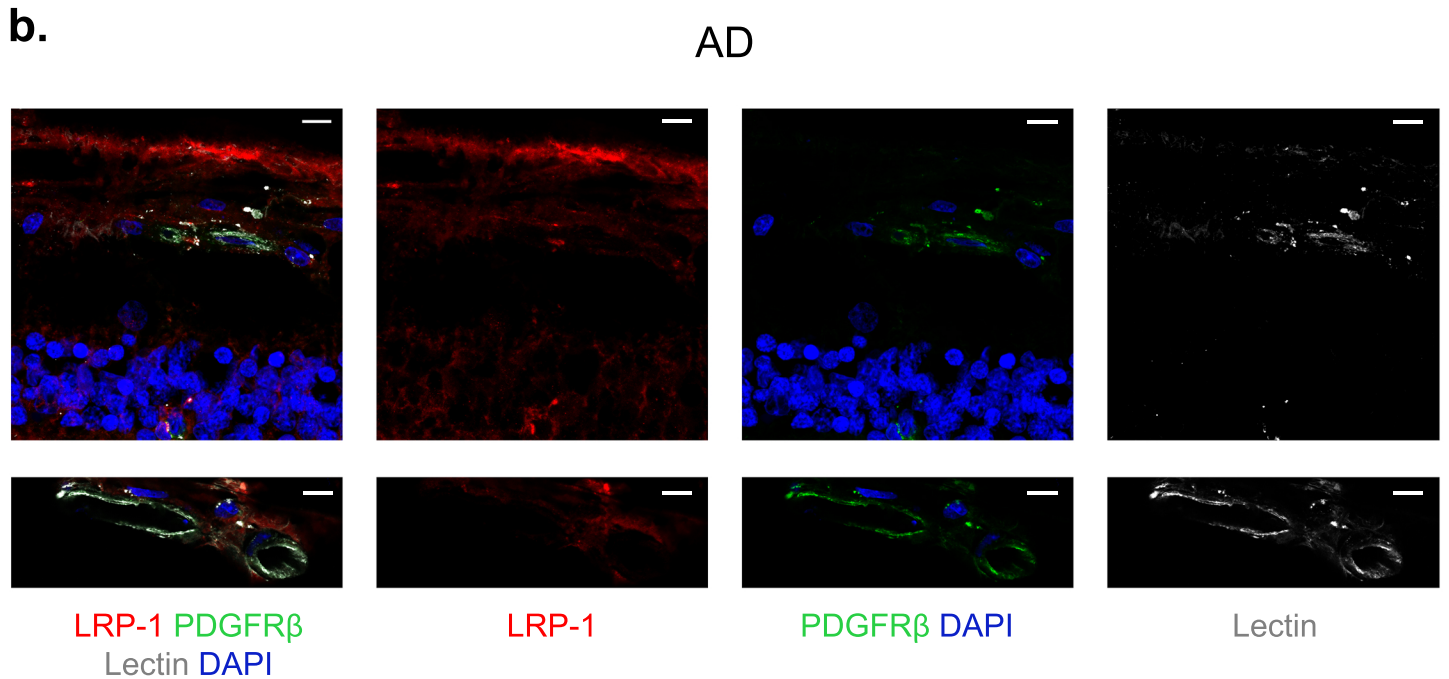

**Supplementary Figure 12.** Extended representative images for LRP-1 in figure 6. **a-b.** Merged and separate channels of representative fluorescent images for LRP-1 (red), PDGFR $\beta$  (green), lectin (glycoprotein in blood vessel, white) and DAPI (nuclei, blue) in paraffin-embedded retinal cross-sections isolated from age and sex-matched human donors with AD or cognitively normal (CN). **a.** CN and **b.** AD are shown. Scale bars=10 $\mu$ m.

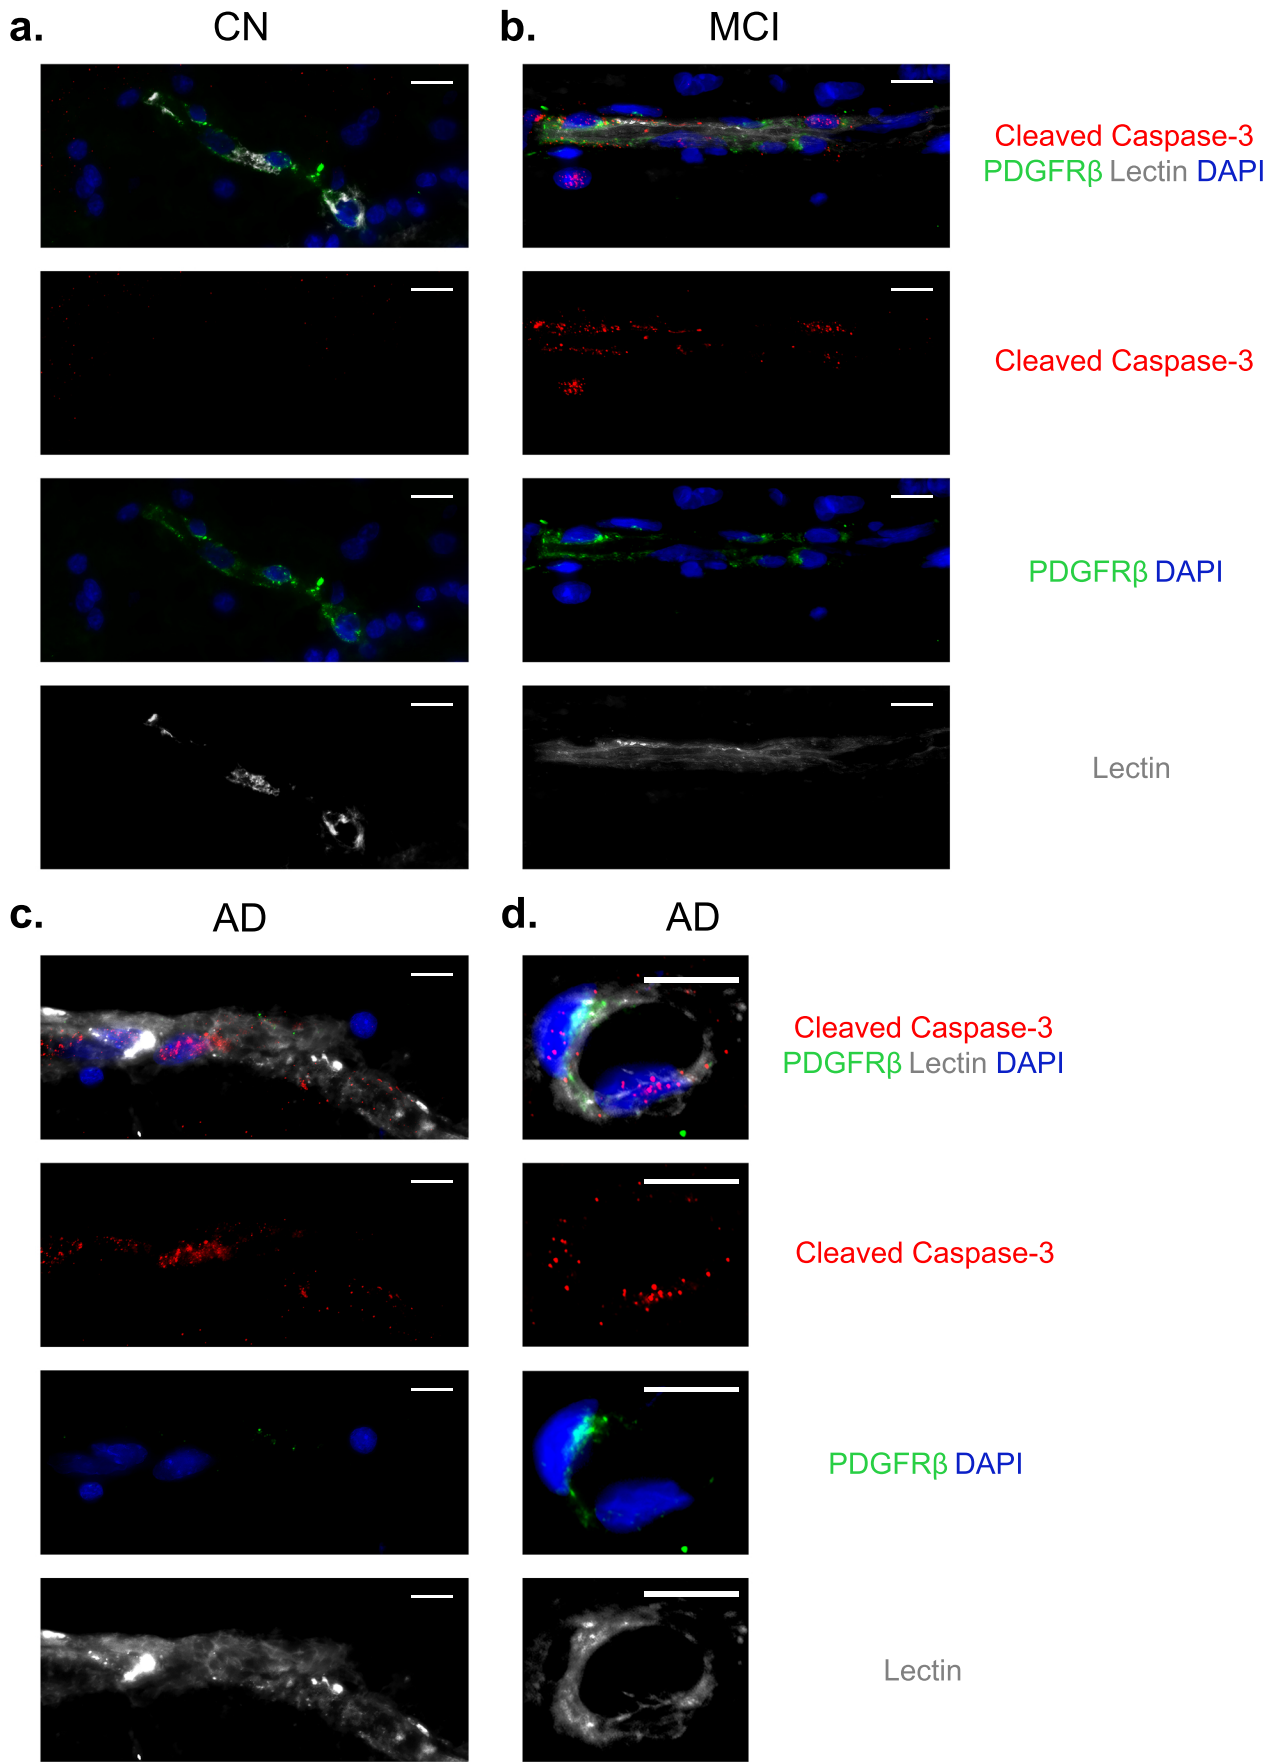

**Supplementary Figure 13.** Extended representative images for cleaved caspase-3 in figure 6. **a-d.** Merged and separate channels of fluorescent images for cleaved caspase-3 (red), PDGFR $\beta$  (green), lectin (glycoprotein in blood vessel, white) and DAPI (nuclei, blue) in paraffin-embedded retinal cross-sections isolated from age and sex-matched human donors with AD, MCI or cognitively normal (CN). **a.** CN, **b.** MCI and **c-d.** AD are shown. Scale bars=10 $\mu$ m.

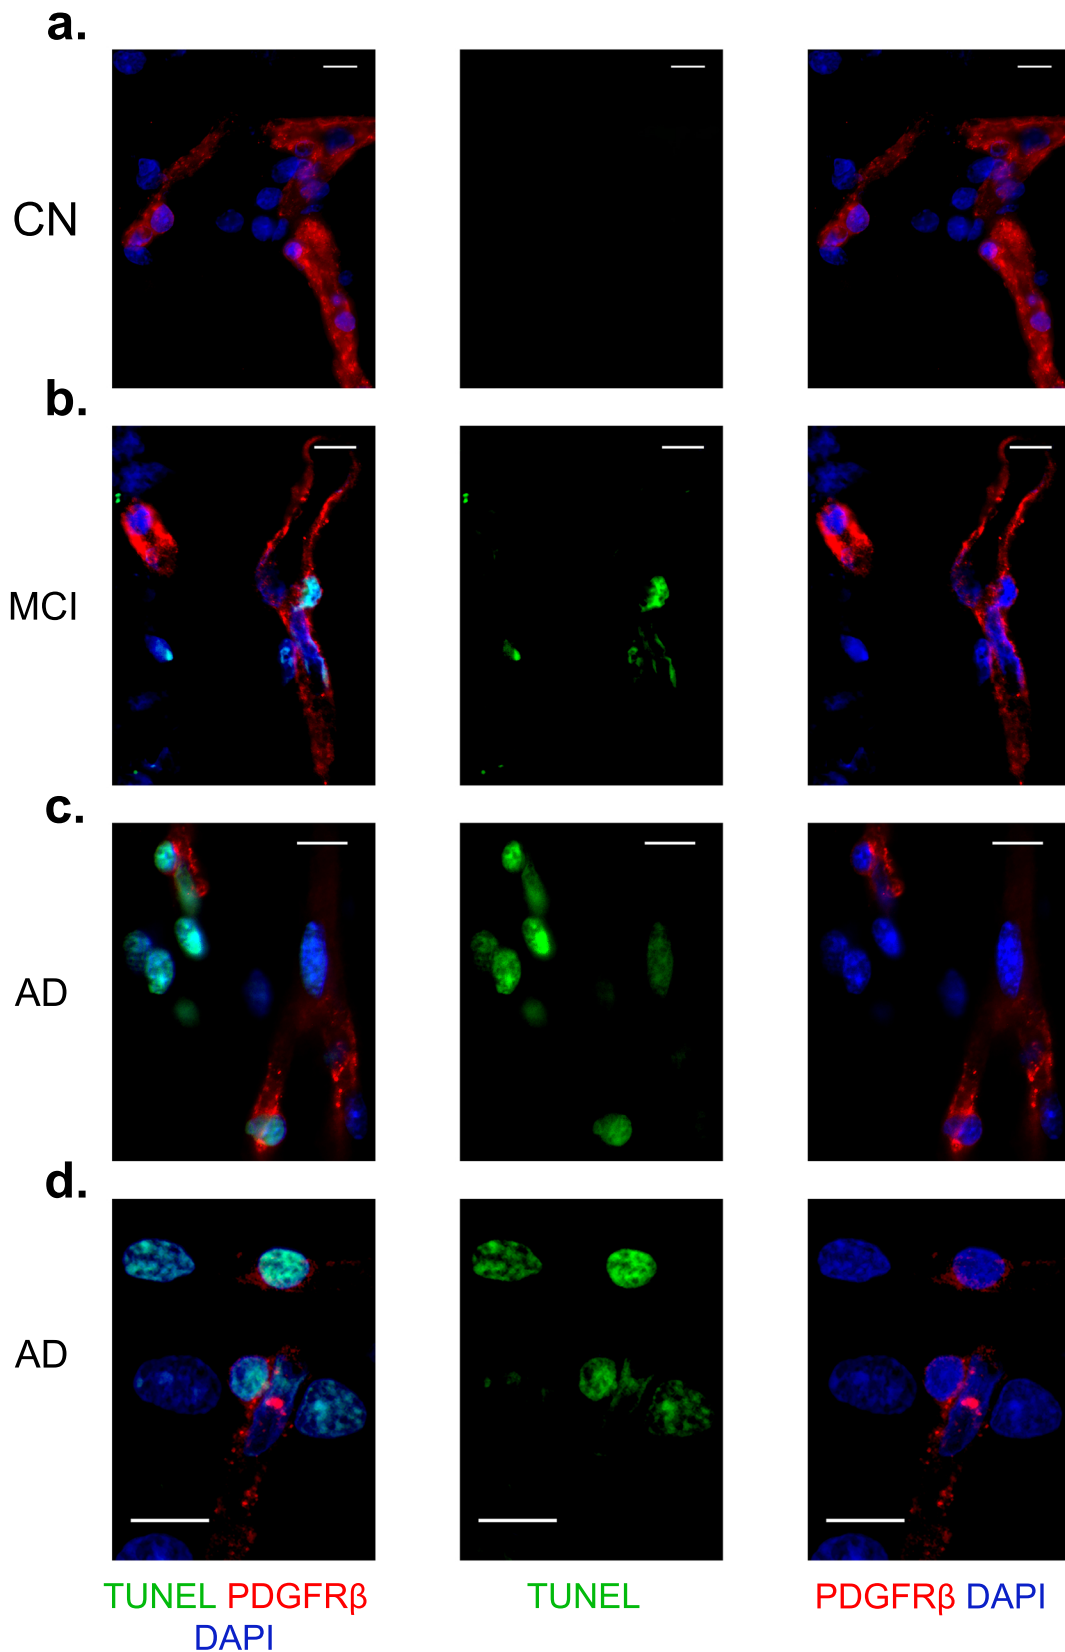

**Supplementary Figure 14.** Extended representative images for TUNEL staining in figure 6. **a-d.** Merged and separate channels of fluorescent images for TUNEL (green), PDGFR $\beta$  (red), and DAPI (nuclei, blue) in paraffin-embedded retinal cross-sections isolated from age and sex-matched human donors with AD, MCI or cognitively normal (CN). **a.** CN, **b.** MCI and **c-d.** AD are shown. Scale bars=10 $\mu$ m.

**Table S1.** Demographic data on human eye donors evaluated by retinal cross-section.

|                                  | CN              | MCI           | AD              | F     | P      |
|----------------------------------|-----------------|---------------|-----------------|-------|--------|
| <b>No. of Subjects</b><br>(n=46) | 14              | 11            | 21              | -     | -      |
|                                  | (9F, 5M)        | (5F, 6M)      | (13F, 8M)       |       |        |
| <b>Age ± SD</b>                  | 79.14 ± 10.5    | 87.09 ± 5.4   | 81.81 ± 14.9    | 1.404 | 0.2567 |
| <b>[Years]</b>                   | F: 79.78 ± 12.3 | F, 90.2 ± 3.6 | F, 85.61 ± 12.6 |       |        |
|                                  | M: 78.0 ± 7.3   | M, 84.5 ± 5.5 | M, 67.2 ± 16.7  |       |        |
| <b>Race</b>                      | 13C (92.9%)     | 7C (81.8%)    | 16C (76.2%)     | -     | -      |
| <b>(%)</b>                       | 1B (7.1%)       | 1H (9.1%)     | 1B (4.8%)       |       |        |
|                                  |                 | 1B (9.1%)     | 4A (19%)        |       |        |
| <b>PMI</b>                       | 7.5 ± 2.3       | 9.5 ± 5.0     | 7.6 ± 3.7       | 1.120 | 0.3355 |
| <b>[Hours]</b>                   |                 |               |                 |       |        |

CN cognitively normal; MCI, mild cognitive impairment; AD, Alzheimer’s disease; F, female, M, male; SD, standard deviation; C, Caucasian; B, Black; H, Hispanic; A, Asian, UK Unknown; PMI, post-mortem interval; Values are presented as mean ± SD. F and P values were determined by one-way ANOVA with Sidak’s multiple comparison test.

**Table S2.** Neuropathological evaluation in a subset of human donors evaluated by retinal cross-section.

| Brain Scores           | CN* (n=1) | MCI (n=7)   | AD (n=17)  |
|------------------------|-----------|-------------|------------|
| CAA                    | 1         | 0.7 ± 0.97  | 1.3 ± 0.75 |
| A $\beta$ Plaque       | 0.545     | 2.11 ± 0.77 | 2.8 ± 0.93 |
| Neurofibrillary Tangle | 0.98      | 1.46 ± 0.99 | 2.5 ± 1.3  |
| Neuropil Thread        | 0.86      | 1.1 ± 0.93  | 1.13 ± 1.2 |
| Atrophy                | 0.8       | 1.09 ± 1.08 | 2.05 ± 1.2 |

CN cognitively normal; MCI, mild cognitive impairment; AD, Alzheimer's disease; A neuropathological score from one CN donor. CAA, cerebral amyloid angiopathy.



**Table S3.** Multiple correlation analysis between % retinal PDGF $\beta$  area in vessels and neuropathological parameters

|                   |          | Neuritic Plaques | Immature Plaques | Diffuse Plaque | NFTs (Silver) | Neuropil Threads |
|-------------------|----------|------------------|------------------|----------------|---------------|------------------|
| All Brain         | <i>r</i> | <b>-0.50</b>     | -0.36            | -0.45          | -0.07         | -0.03            |
|                   | <i>P</i> | <b>0.0264</b>    | 0.1224           | 0.0443         | 0.7801        | 0.9022           |
| Hippocampus       | <i>r</i> | <b>-0.61</b>     | -0.40            | -0.38          | -0.17         | 0.12             |
|                   | <i>P</i> | <b>0.0046</b>    | 0.0802           | 0.0986         | 0.4622        | 0.6184           |
| Entorhinal Cortex | <i>r</i> | <b>0.26</b>      | -0.01            | 0.35           | 0.15          | -0.23            |
|                   | <i>P</i> | <b>0.0433</b>    | 0.2598           | 0.3403         | 0.4902        | 0.5154           |
| Frontal Cortex    | <i>r</i> | -0.01            | -0.30            | -0.04          | -0.38         | -0.34            |
|                   | <i>P</i> | 0.9543           | 0.1990           | 0.8586         | 0.1027        | 0.1396           |
| Temporal Cortex   | <i>r</i> | -0.06            | -0.33            | -0.35          | -0.09         | -0.18            |
|                   | <i>P</i> | 0.8066           | 0.1551           | 0.1265         | 0.7234        | 0.4504           |
| Parietal Cortex   | <i>r</i> | 0.05             | 0.01             | -0.28          | -0.33         | -0.39            |
|                   | <i>P</i> | 0.8431           | 0.9769           | 0.2280         | 0.1511        | 0.0938           |
| PV. Ctx. A-17     | <i>r</i> | -0.32            | -0.35            | -0.46          | -0.25         | <b>-0.55</b>     |
|                   | <i>P</i> | 0.2134           | 0.1540           | 0.0568         | 0.3412        | <b>0.0175</b>    |
| VA. Ctx. A-18     | <i>r</i> | <b>-0.74</b>     | -0.30            | <b>-0.58</b>   | -0.39         | -0.46            |
|                   | <i>P</i> | <b>0.0015</b>    | 0.2598           | <b>0.0192</b>  | 0.1457        | 0.0872           |

Correlations between retinal % area of PDGF $\beta$  in vessels and the corresponding neuropathological measurements: neuritic plaques, immature plaques, diffuse plaques, neurofibrillary tangles (NFTs; by Gallyas Silver stain), neuropil threads by silver stain. Scores are given as: 0 = None, 1 = Sparse (-5), 3 = Moderate (6-20), 5 = Frequent (21-30 or above) based on pathological reports. Analysis was performed for mean of all brain regions and separated for each brain region. Sample size: n=14 for AD, n=5 for MCI, n=1 for CN. Statistical significance *P* is < 0.05 indicated in bold red color. Pearson's *r* correlations analysis was applied to determine relationships; PV – primary visual; VA – visual association; Ctx – cortex.

**Table S4.** Multiple correlation analysis between % retinal A $\beta_{40}$  area in vessels and neuropathological parameters

|                   |          | Neuritic Plaques | Immature Plaques | Diffuse Plaques | NFTs (Silver) | Neuropil Threads |
|-------------------|----------|------------------|------------------|-----------------|---------------|------------------|
| All Brain         | <i>r</i> | <b>0.55</b>      | 0.44             | 0.16            | 0.24          | <b>0.58</b>      |
|                   | <i>P</i> | <b>0.0492</b>    | 0.1292           | 0.6122          | 0.4278        | <b>0.0375</b>    |
| Hippocampus       | <i>r</i> | 0.41             | 0.22             | 0.08            | 0.37          | 0.48             |
|                   | <i>P</i> | 0.1649           | 0.4702           | 0.7984          | 0.211         | 0.0967           |
| Entorhinal Cortex | <i>r</i> | <b>0.77</b>      | 0.47             | 0.2             | 0.33          | 0.31             |
|                   | <i>P</i> | <b>0.0023</b>    | 0.1012           | 0.505           | 0.2755        | 0.3018           |
| Frontal Cortex    | <i>r</i> | 0.05             | 0.53             | -0.06           | 0.40          | 0.53             |
|                   | <i>P</i> | 0.8747           | 0.0638           | 0.8475          | 0.1777        | 0.0616           |
| Temporal Cortex   | <i>r</i> | 0.00             | 0.23             | 0.02            | 0.06          | 0.57             |
|                   | <i>P</i> | 0.9878           | 0.4551           | 0.9574          | 0.8534        | 0.0507           |
| Parietal Cortex   | <i>r</i> | 0.02             | -0.09            | 0.15            | 0.14          | 0.38             |
|                   | <i>P</i> | 0.941            | 0.7627           | 0.6274          | 0.6522        | 0.2022           |
| PV. Ctx. A-17     | <i>r</i> | 0.18             | <b>0.6</b>       | 0.21            | -0.19         | <b>0.64</b>      |
|                   | <i>P</i> | 0.5929           | <b>0.0373</b>    | 0.5179          | 0.5798        | <b>0.0347</b>    |
| VA. Ctx. A-18     | <i>r</i> | 0.54             | 0.53             | -0.09           | -0.03         | <b>0.84</b>      |
|                   | <i>P</i> | 0.1377           | 0.1137           | 0.8081          | 0.93          | <b>0.0042</b>    |

Correlations between retinal % area of A $\beta_{40}$  in vessels and the corresponding neuropathological measurements: neuritic plaques, immature plaques, diffuse plaques, neurofibrillary tangles (NFTs; by Gallyas Silver stain), neuropil threads by silver stain. Scores are given as: 0 = None, 1 = Sparse (-5), 3 = Moderate (6-20), 5 = Frequent (21-30 or above) based on pathological reports. Analysis was performed for mean of all brain regions and separated for each brain region. Sample size: n=8 for AD, n=3 for MCI, n=1 for CN patients. Statistical significance *P* is < 0.05 indicated in bold red color. Pearson's *r* correlations analysis was applied to determine relationships; PV – primary visual; VA – visual association; Ctx – cortex.

**Table S5.** Correlation between % PDGFR $\beta$  immunoreactive area per retinal subregions and MMSE scores.

| Retinal Regions | Total  | ST    | TI     | IN     | NS     | Superior | Inferior | Nasal  | Temporal |
|-----------------|--------|-------|--------|--------|--------|----------|----------|--------|----------|
| <i>r</i>        | 0.77   | 0.89  | 0.82   | 0.71   | 0.92   | 0.92     | 0.71     | 0.73   | 0.89     |
| <i>P</i>        | 0.0156 | 0.016 | 0.1825 | 0.0499 | 0.0271 | 0.0036   | 0.0486   | 0.0411 | 0.0171   |
| N               | 9      | 6     | 4      | 8      | 5      | 7        | 8        | 8      | 6        |

Total; total retinal average; ST, superiortemporal; TI, temporalinferior; IN, inferioirnasal; NS, nasalsuperior; Superior, mean of ST and NS values; Inferior, mean of TI and IN values; Nasal, mean of IN and NS values; Temporal, mean of ST and TI values. N, number of pairs. Statistical significance *P* is < 0.05. Pearson's *r* correlations analysis was applied to determine relationships.

**Table S6.** Correlation between A $\beta$ <sub>40</sub> burden per retinal subregions and MMSE cognitive scores.

| Retinal Regions | Total  | ST     | TI  | IN     | NS  | Superior | Inferior | Nasal  | Temporal |
|-----------------|--------|--------|-----|--------|-----|----------|----------|--------|----------|
| <i>r</i>        | -0.57  | -0.71  | N/A | -0.65  | N/A | -0.73    | -0.67    | -0.66  | -0.75    |
| <i>P</i>        | 0.0827 | 0.0737 | N/A | 0.1107 | N/A | 0.0625   | 0.099    | 0.1062 | 0.0539   |
| <i>n</i>        | 10     | 7      | N/A | 7      | N/A | 7        | 7        | 7      | 7        |

Total; total retinal average; ST, superiortemporal; TI, temporalinferior; IN, inferioirnasal; NS, nasalsuperior; Superior, mean of ST and NS values; Inferior, mean of TI and IN values; Nasal, mean of IN and NS values; Temporal, mean of ST and TI values. N, number of pairs. N/A, not applicable. Statistical significance *P* is < 0.05. Pearson's *r* correlations analysis was applied to determine relationships.
